# Supplementary material for: Which pigment appears first in the corolla—patterned or background?
Source: Research Square preprint supplement (doi:10.21203/rs.3.rs-1118106/v1), 2022-01-21
Supplement: Supplementary file 1 [file e6c3f69e4e0441dd304cd505.xlsx]

## Sheet: Sheet1
Sampled Taxa [Light red highlighted rows mark gymnosperm taxa without flowers] [Dark red row is the data point that was earlier included but later not used as the image was not clear]	Species Name [Yellow Highlight marks those with no or not clear online pictures]	Family name [Purple highlight are those families which I had to metion on the APG IV poster]	Pattern and Background Present (1) /absent (0) [Blue highlight marks those with both background and pattered pig.n]	Description of Pigmentation and Pattern type [green highlights - flowers with pattern on white/colourless background]	image souce cite	Image Source	Notes
Acanthus	Acanthus ebracteatus	Acanthaceae	0	? Yellow blotch on white background	The Biodiversity of Singapore	https://singapore.biodiversity.online/species/P-Angi-001946?imageId=0
Acharia	Acharia tragodes	Achariaceae	0	green perianth		https://floraoftheworld.org/taxon/flora/17592186263006
Caloncoba	Caloncoba lophocarpa	Achariaceae	no online information
Carpotroche	Carpotroche longifolia	Achariaceae	0	white background in petals		https://floraoftheworld.org/taxon/flora/17592186258175
Erythrospermum	Erythrospermum phytolaccoides	Achariaceae	no online information
Hydnocarpus	Hydnocarpus heterophylla	Achariaceae	0	creamish yellow background		http://www.floraofbangladesh.com/2018/10/chalmugra-or-dalmugri-hydnocarpus-kurzii.html
Kiggelaria	Kiggelaria africana	Achariaceae	0	creamish yellow-green background		https://treesa.org/kiggelaria-africana/
Pangium	Pangium edule	Achariaceae	0	creamish yellow-green background		https://floraoftheworld.org/taxon/flora/17592186258178
Phaulothamnus	Phaulothamnus spinescens	Achatocarpaceae	0	greenish blotch on white petals	North American network of small herbaria	https://storage.idigbio.org/portals/seinet/arizona/Achatocarpaceae/201809/phaulothamnus-spinescens-flowe_1536450243.jpg
Acorus	Acorus calamus	Acoraceae	0	perianth absent? [very small]	Online Atlas of the British and Irish Flora	https://www.brc.ac.uk/plantatlas/plant/acorus-calamus
Actinidia	Actinidia arguta	Actinidiaceae	0	white background only	hard kiwi, arboriculture	http://www.mntreeresources.com/hardy-kiwi.html	https://www.researchgate.net/figure/Male-left-and-female-right-flowers-of-Actinidia-arguta_fig1_340340554
Adoxa	Adoxa moschatellina	Adoxaceae	0	yellowish green petals	Online Atlas of the British and Irish Flora	https://www.brc.ac.uk/plantatlas/plant/adoxa-moschatellina
Sambucus	Sambucus canadensis	Adoxaceae	0	white flower (white background only)		https://plants.ces.ncsu.edu/plants/sambucus-canadensis/
Sinadoxa	Sinadoxa corydalifolia	Adoxaceae	no online information
Tetradoxa	Tetradoxa omeiensis	Adoxaceae	0	creamish-green flowers		http://tolweb.org/onlinecontributors/app?page=ViewImageData&service=external&sp=6049
Viburnum	Viburnum acerifolium	Adoxaceae	0	white flowers		https://www.carolinanature.com/trees/viac.html
Aextoxicon	Aextoxicon punctatum	Aextoxicaceae	0	white petals with yellow tinge	EOL	https://eol.org/pages/6874526	https://serv.biokic.asu.edu/neotrop/plantae/taxa/index.php?tid=75161
Delosperma	Delosperma napiforme	Aizoaceae	no online information
Lampranthus	Lampranthus filicaulis	Aizoaceae	no online information
Alisma	Alisma plantage-aquatica	Alismataceae	0	White background yellow blotch	North Carolina Extension Gardener Plant Toolbox	https://plants.ces.ncsu.edu/plants/alisma-plantago-aquatica/
Alseuosmia	Alseuosmia macrophylla	Alseuosmiaceae	0	Magenta pattern on white background	Native New Zealand Plants	http://www.nzplants.auckland.ac.nz/en/about/seed-plants-flowering/alseuosmiaceae/alseuosmia-macrophylla.html
Crispiloba	Crispiloba disperma	Alseuosmiaceae	0	White background		http://www.canbr.gov.au/cpbr/cd-keys/RFK7/key/RFK7/Media/Html/entities/Crispiloba_disperma.htm
Platyspermation	Platyspermation crassifolium	Alseuosmiaceae	0	White background		http://angio.bergianska.se/Bilder/asterids/Campanulales/Alseuosmiaceae/Platyspermation/
Wittsteinia	Wittsteinia vacciniacea	Alseuosmiaceae	1	abaxial surface yellowish green background + rosy red blotch/tinge		https://www.yarraranges.vic.gov.au/PlantDirectory/Herbs-Groundcovers/Wittsteinia-vacciniacea
Daphnandra	Daphnandra micrantha	Altherospermataceae	no online information
Altingia	Altingia excelsa	Altingiaceae	no online information
Liquidambar	Liquidambar styraciflua	Altingiaceae	0	no showy petals (wind pollinated); small; greenish red	https://plants.ces.ncsu.edu/plants/liquidambar-styraciflua/	https://bwwellsassociation.wordpress.com/2016/04/07/spring-flowers-of-the-sweet-gum-tree-liquidambar-styraciflua/
Celosia	Celosia argentea	Amaranthaceae	0	purple/silver coloured flowers		http://www.flowersofindia.net/catalog/slides/Silver%20Cockscomb.html
Allium	Allium grayi	Amaryllidaceae	0	white/purple flowers (background only)	Kyung-min Kim et al. 2010 Natural Habitats' Characteristics of Allium grayi in Korea	https://www.semanticscholar.org/paper/Natural-Habitats'-Characteristics-of-Allium-grayi-Kim-Kim/53593e7ec4d00f28d67ceef45e6fa552eb2ebaeb
Amborella	Amborella trichopoda	Amborellaceae	0	white flowers	Britannica	https://www.britannica.com/plant/Amborella-trichopoda
Schinus	Schinus molle	Anacardiaceae	0	white flowers		https://selectree.calpoly.edu/tree-detail/schinus-molle
Ancistrocladus	Ancistrocladus korupensis	Ancistrocladaceae	no online information
Anisophyllea	Anisophyllea fallax	Anisophyllaceae	no online information
Annona	Annona muricata	Annonaceae	0	yellow flowers		https://swbiodiversity.org/seinet/taxa/index.php?taxon=Annona+muricata
Cananga	Cananga odorata	Annonaceae	1	yellow background and very small red blotch	https://www.sciencephoto.com/media/461015/view/ylang-ylang-cananga-odorata-flower	https://botanyphoto.botanicalgarden.ubc.ca/2017/09/cananga-odorata/; https://www.oils4life.co.uk/5ml-Ylang-Ylang-ORGANIC-essential-oil-Cananga-Odorata-Flower-Oil
Aphanopetalum	Aphanopetalum resinosum	Aphanopetalaceae	0	white petals		https://www.anbg.gov.au/gnp/gnp12/aphanopetalum-resinosum.html
Aphloia	Aphloia theiformis	Aphloiaceae	0	white flowers		http://www.biodiversityexplorer.info/plants/aphloiaceae/aphloia_theiformis.htm
Anethum	Anethum graveolens	Apiaceae	0	yellow flowers		https://plants.ces.ncsu.edu/plants/anethum-graveolens/
Angelica	Angelica lucida	Apiaceae	0	white flowers		https://gobotany.nativeplanttrust.org/species/angelica/lucida/
Apium	Apium graveolens	Apiaceae	0	white flowers		http://www.flowersofindia.net/catalog/slides/Celery.html
Arctopus	Arctopus echinatus	Apiaceae	0	yellowish white flowers		http://www.westfordbridge.co.za/arctopus_echinatus.htm
Azorella	Azorella caespitosa	Apiaceae	0	yellow flowers		https://pfaf.org/user/Plant.aspx?LatinName=Azorella+caespitosa
Coriandrum	Coriandrum sativum	Apiaceae	0	white flowers	https://plants.ces.ncsu.edu/plants/coriandrum-sativum/	https://upload.wikimedia.org/wikipedia/commons/7/7c/Coriandrum_sativum_003.JPG	White/ pale lilac? do those lines at base corolla count as pattern? none in	https://plants.ces.ncsu.edu/plants/coriandrum-sativum/
Heteromorpha	Heteromorpha trifoliata	Apiaceae	0	white/yellow flowers	http://pza.sanbi.org/heteromorpha-arborescens	https://plants.jstor.org/compilation/Heteromorpha.trifoliata	petals pale yellow to yellowish-green
Mackinlaya	Mackinlaya confusa	Apiaceae	0	petals green/absent? very small		http://www.canbr.gov.au/cpbr/cd-keys/RFK7/key/RFK7/Media/Html/entities/Mackinlaya_confusa.htm	? greenish?
Sanicula	Sanicula gregaria synonym of Sanicula odorata K.M. Pryer & L.R.Phillippe	Apiaceae	0	yellowish green flowers	http://iowaplants.com/flora/contact.html	http://iowaplants.com/flora/family/Apiaceae/sanicula/s_odorata/Sanicula_odorata.html	greenish yellow
Scabiosa	Scabiosa columbaria	Apiaceae	0	blue/white/purple background only	https://plants.ces.ncsu.edu/plants/scabiosa-columbaria-butterfly-blue/	https://gobotany.nativeplanttrust.org/species/scabiosa/columbaria/	what about horticultural forms? -- this one variable, no patterns/pattern
Platysace	Platysace lanceolata	Apiaceae	0	white flowers		https://plantnet.rbgsyd.nsw.gov.au/cgi-bin/NSWfl.pl?page=nswfl&lvl=sp&name=Platysace~lanceolata	white or creamy
Nerium	Nerium oleander	Apocynaceae	0	rosy pink flowers/ white flowers		https://plants.ces.ncsu.edu/plants/nerium-oleander/
Ilex	Ilex aquifolium	Aquifoliaceae	0	white flowers	http://powo.science.kew.org/taxon/urn:lsid:ipni.org:names:83051-1	https://keyserver.lucidcentral.org/weeds/data/media/Html/ilex_aquifolium.htm
Lemna	Lemna aequinoctialis	Araceae	0	no petals?	http://www.efloras.org/florataxon.aspx?flora_id=5&taxon_id=10488	https://www.researchgate.net/publication/280017847_The_taxonomy_and_report_of_flowering_in_Lemna_L_Lemnaceae_in_India
Orontium	Orontium aquaticum	Araceae	0	yellow flowers		http://www.southeasternflora.com/view_flora.php?plantid=518
Spathiphyllum	Spathiphyllum wallisii	Araceae	0	white flowers		http://www.flowersinisrael.com/exoticSpathiphyllumwallisii_page.htm
Xanthosoma	Xanthosoma helleborifolium	Araceae	0	yellowish cream		http://www.plantsoftheworldonline.org/taxon/urn:lsid:ipni.org:names:89373-1
Aralia	Aralia spinosa	Araliaceae	0	green flowers		https://gobotany.nativeplanttrust.org/species/aralia/spinosa/
Cussonia	Cussonia spicata	Araliaceae	0	white flowers		https://anthrome.wordpress.com/2011/08/29/aralicaceae-cussonia-spicata-africa-soutehrn-cape-mosambique-zimbabwe-zambia-nambia-etc/img_8630/
Hedera	Hedera helix	Araliaceae	0	cream coloured flowers		https://keyserver.lucidcentral.org/weeds/data/media/Html/hedera_helix.htm
Hydrocotyle	Hydrocotyle sibthorpioides	Araliaceae	0	white flowers		https://www.flowersofindia.net/catalog/slides/Water%20Pennywort.html
Polyscias	Polyscias guilfoylei	Araliaceae	photo not clear			https://plants.ces.ncsu.edu/plants/polyscias-guilfoylei/
Pseudopanax	Pseudopanax arboreus	Araliaceae	0	creamish white flowers		https://www.nzpcn.org.nz/flora/species/pseudopanax-arboreus/
Schefflera	Schefflera arboricola	Araliaceae	photo not clear
Tetrapanax	Tetrapanax papyrifer	Araliaceae	0	creamish white flowers		https://www.flowersofindia.net/catalog/slides/Rice-Paper%20Plant.html
Tetraplasandra	Polyscias hawaiensis	Araliaceae	photo not clear
Panax	Panax ginseng	Araliaceae	0	white flowers		https://gobotany.nativeplanttrust.org/species/panax/trifolius/
Chamaedorea	Chamaedorea seifrizii	Arecaceae	0	yellow flowers?		https://plants.ces.ncsu.edu/plants/chamaedorea-elegans/
Elaeis	Elaeis oleifera	Arecaceae	photo not clear
Argophyllum	Argophyllum laxum	Argophyllaceae	0	creamish white petals	http://www.canbr.gov.au/cpbr/cd-keys/RFK7/key/RFK7/Media/Html/entities/Argophyllum_nullumense.htm	https://identify.plantnet.org/explo/endemia/?family=Argophyllaceae
Corokia	Corokia cotoneaster	Argophyllaceae	0	yellow background only		https://botanicgardens.uw.edu/about/blog/2017/03/01/march-2017-plant-profile-corokia-cotoneaster/
Aristolochia	Aristolochia gigantea	Aristolochiaceae	0	complex pattern on white background		https://weeds.brisbane.qld.gov.au/weeds/dutchmans-pipe
Lactoris	Lactoris fernandeziana	Aristolochiaceae	0	white flowers	https://www.britannica.com/plant/Lactoris-fernandeziana	https://www.frontiersin.org/articles/10.3389/fpls.2021.642598/full
Saruma	Saruma henryi	Aristolochiaceae	0	yellow flower		https://heronswoodgarden.org/the-primitive-charms-of-saruma-henryi/
Thottea	Thottea tomentosa	Aristolochiaceae	1	blotch pattern	http://www.tfbc.frim.gov.my/newsletter/Thottea%20tomentosa%20-%20Flower.asp	http://www.plantsoftheworldonline.org/taxon/urn:lsid:ipni.org:names:3169-1	http://www.tfbc.frim.gov.my/newsletter/Thottea%20tomentosa%20%20-%20Flower(iii).asp
Agave	Agave ghiesbreghtii	Asparagaceae	not found
Asparagus	Asparagus officinalis	Asparagaceae	0	light yellow flowers		https://gobotany.nativeplanttrust.org/species/asparagus/officinalis/
Beaucarnea	Beaucarnea recurvata	Asparagaceae	0	creamish white flowers		https://www.palmtalk.org/forum/index.php?/topic/53369-beaucarnea-recurvata-flowers/
Lomandra	Lomandra obliqua	Asparagaceae	0	Yellow flowers	Plants of South Eastern New South Wales	https://apps.lucidcentral.org/plants_se_nsw/text/entities/lomandra_obliqua.htm;	http://www.plantsoftheworldonline.org/taxon/urn:lsid:ipni.org:names:20605-1
Yucca	Yucca filamentosa	Asparagaceae	0	White flowers with outer tepal whorl having yellow flush	Plants of the world online (Kew Science)	http://www.plantsoftheworldonline.org/taxon/urn:lsid:ipni.org:names:325008-2
Barnadesia	Barnadesia arborea	Asteraceae	1	Pink ray florets with dark pink blotch at the base		https://floradelamitaddelmundo.wordpress.com/2020/06/11/01346-espino-rojo-barnadesia-arborea/
Cichorium	Cichorium intybus	Asteraceae	0	Bluish-purple background colouration		https://docs.google.com/spreadsheets/d/1TFE2Dyq2pC4eO73dA-nNr0N7iyERYmLHwbSx0ZhQwBE/edit#gid=1062989352
Echinops	Echinops exaltatus	Asteraceae	0	Bluish-purple background colouration		https://namethatplant.wordpress.com/tag/echinops-exaltatus/
Gerbera	Gerbera jamesonii	Asteraceae	0	Red background colouration		http://www.plantsoftheworldonline.org/taxon/urn:lsid:ipni.org:names:208893-1
Guizotia	Guizotia abyssinica	Asteraceae	0	Yellow flowers		http://www.flowersofindia.net/catalog/slides/Ramtil.html
Helianthus	Helianthus annuus	Asteraceae	0/1	yellow ray florets with red blotch in some varieties		http://www.plantsoftheworldonline.org/taxon/urn:lsid:ipni.org:names:119003-2
Lactuca	Lactuca sativa	Asteraceae	0	yellow flowers	Flowers of India	http://www.flowersofindia.net/catalog/slides/Lettuce.html
Tagetes	Tagetes patula	Asteraceae	1	Yellow background, red blotch		https://plants.ces.ncsu.edu/plants/tagetes-patula/
Tragopogon	Tragopogon pratensis	Asteraceae	0	yellow flower		https://www.britannica.com/plant/goatsbeard-plant-Tragopogon-pratensis
Asteropeia	Asteropeia micraster	Asteropeiaceae	0	greenish petals	http://www.mobot.org/MOBOT/Madagasc/Image/637_064l.JPG	http://www.mobot.org/MOBOT/research/conspectus/astero.shtml
Austrobaileya	Austrobaileya scandens	Austrobaileyaceae	0	spots on cream coloured background		http://florawww.eeb.uconn.edu/200202459.html
Atherosperma	Atherosperma moschatum	Atherospermataceae	0	pink (blotch) cental pattern on white petals		https://www.utas.edu.au/docs/plant_science/field_botany/species/dicots/monimisp/athemosc.html
Balanops	Balanops vieillardii	Balanopaceae	image not found
Impatiens	Impatiens capensis	Balsaminaceae	1	red spots on yellow background		https://plants.ces.ncsu.edu/plants/impatiens-capensis/
Barbeuia	Barbeuia madagascariensis	Barbeuiaceae	not found
Basella	Basella alba	Basellaceae	0	White background with pink flush on the tip		http://www.epharmacognosy.com/2020/03/basella-alba-l.html
Batis	Batis maritima	Bataceae	0	white flowers		http://nathistoc.bio.uci.edu/plants/Bataceae/Batis%20maritima.htm
Begonia	Begonia cinnabarina	Begoniaceae	0	orange petals		http://tropicalflowers.la.coocan.jp/Begoniaceae/Begonia%20cinnabarina/Begonia%20cinnabarina.htm
Caulophyllum	Caulophyllum thalictroides	Berberidaceae	0/1	greenish background + purple blush?	http://www.missouriplants.com/Caulophyllum_thalictroides_page.html	https://www.usgs.gov/media/images/caulophyllum-thalictroides-3-blue-cohosh-flower	https://gobotany.nativeplanttrust.org/species/caulophyllum/thalictroides/
Nandina	Nandina domestica	Berberidaceae	0	red spots on white background	https://plants.ces.ncsu.edu/plants/nandina-domestica/	https://www.flowersofindia.net/catalog/slides/Sacred%20Bamboo.html
Berberidopsis	Berberidopsis corallina	Berberidopsida	0	red petals		https://stories.rbge.org.uk/archives/6026
Alnus	Alnus sinuata	Betulaceae	0	green spike (very small flowers)		https://pfaf.org/user/Plant.aspx?LatinName=Alnus+sinuata
Catalpa	Catalpa bignonioides	Bignoniaceae	0	Purple and yellow blotches on white background	https://plants.ces.ncsu.edu/plants/catalpa-bignonioides/	https://www.flowersofindia.net/catalog/slides/Indian%20Bean%20Tree.html
Bixa	Bixa orellana	Bixaceae	0	sometimes with a purple flush on white background		http://www.floraofbangladesh.com/2017/12/shinduri-bij-or-achiote-bixa-orellana.html
Blandfordia	Blandfordia punicea	Blandfordiaceae	0	petals yellow from inside red from outside		https://www.utas.edu.au/dicotkey/dicotkey/lilies_etc/gBlandfordia.htm
Archytaea	Archytaea multiflora	Bonnetiaceae	not found
Bonnetia	Bonnetia sessilis	Bonnetiaceae	not found			http://powo.science.kew.org/taxon/urn:lsid:ipni.org:names:330098-2
Borago	Borago officinalis	Boraginaceae	0	blue flowers		https://pfaf.org/user/Plant.aspx?LatinName=Borago+officinalis
Arabidopsis	Arabidopsis thaliana	Brassicaceae	0	yellowish blotch at base on white petals	http://genesdev.cshlp.org/content/13/3/334/F1.large.jpg	https://www.leeds.ac.uk/news/article/3448/plant_scientists_have_been_studying_wrong_plant
Brassica	Brassica oleracea	Brassicaceae	0	yellow flowers		https://gobotany.nativeplanttrust.org/species/brassica/oleracea/
Vriesea	Jagrantia monstrum	Bromeliaceae	not found
Brunellia	Brunellia acutangla	Brunelliaceae	0	very small flowers (green/white petals)	https://serv.biokic.asu.edu/neotrop/plantae/taxa/index.php?taxon=145890&clid=1014	https://biokic1.rc.asu.edu/neotrop/plantae/collections/individual/index.php?occid=4307170, https://inaturalist.ca/taxa/71460-Brunelliaceae	http://powo.science.kew.org/?q=Brunellia
Berzelia	Berzelia lanuginosa	Bruniaceae	0	white/pink very small flowers	https://www.flowervalley.co.za/en/specie/berzelia-lanuginosa-2/	https://www.phillipskop.co.za/flora/berzelia-lanuginosa-berzelia-alopecuroides
Brunia	Brunia alopecuroides	Bruniaceae	0	white/pink very small flowers	http://www.plantsoftheworldonline.org/taxon/urn:lsid:ipni.org:names:30050268-2	http://www.africanplants.senckenberg.de/root/index.php?page_id=78&id=6706#, https://www.phillipskop.co.za/flora/berzelia-lanuginosa-berzelia-alopecuroides
Bursera	Bursera inaguensis	Burseraceae	0	creamish white petals		https://swbiodiversity.org/seinet/taxa/index.php?taxon=4177
Buxus	Buxus sempervirens	Buxaceae	0	creamish white petals		https://www.flowersofindia.net/catalog/slides/Common%20Boxwood.html
Didymeles	Didymeles perrieri	Buxaceae	not found
Pachysandra	Pachysandra procumbens	Buxaceae	not found
Byblis	Byblis liniflora	Byblidaceae	1	purple veins with purple background		http://www.sarracenia.com/faq/faq5080.html
Brasenia	Brasenia schreberi	Cabombaceae	0	pink/mauve petals		https://plants.ces.ncsu.edu/plants/brasenia-schreberi/
Cabomba	Cabomba caroliniana	Cabombaceae	0	White background with yellow blotch		https://nas.er.usgs.gov/queries/FactSheet.aspx?SpeciesID=231
Opuntia	Opuntia microdasys	Cactaceae	0	yellow flower		https://plants.ces.ncsu.edu/plants/opuntia-microdasys/
Pereskia	Pereskia aculeata	Cactaceae	0	creamish yellow petals		https://www.researchgate.net/figure/Panicles-of-flowers-of-Pereskia-aculeata-Mill-Picture-by-Geoff-R-Nichols_fig98_255961207
Calceolaria	Calceolaria arachnoidea	Calceolariaceae	0	purple petals	http://temperate.theferns.info/image/Calceolaria+arachnoidea	https://davesgarden.com/guides/pf/showimage/323959/
Idiospermum	Idiospermum astraliense	Calycanthaceae	0	pink petals		http://www.anbg.gov.au/cpbr/cd-keys/RFK7/key/RFK7/Media/Html/entities/Idiospermum_australiense.htm
Calophyllum	Calophyllum soulattri	Calophyllaceae	0	white petals (i.e. background only)	https://www.nparks.gov.sg/florafaunaweb/flora/2/7/2776	http://www.plantsoftheworldonline.org/taxon/urn:lsid:ipni.org:names:19322-1
Mammea	Mammea americana	Calophyllaceae	0	White flowers		https://plants.usda.gov/core/profile?symbol=MAAM2#
Mesua	Mesua sp.	Calophyllaceae	0	White flowers		https://www.nparks.gov.sg/florafaunaweb/flora/3/0/3023
Calycanthus	Calycanthus floridus	Calycanthaceae	0	magenta red petals	https://gobotany.nativeplanttrust.org/species/calycanthus/floridus/	https://www.indefenseofplants.com/blog/2016/6/6/sweetshrub
Acicarpha	Acicarpha tribuloides	Calyceraceae	0	white flowers	ResearchGate [Denham et al. 2016)	https://www.researchgate.net/figure/Calyceraceae-species-of-clade-A-A-Acicarpha-tribuloides-Zuloaga-8432-SI-B-A_fig4_311808623
Boopis	Boopis graminea	Calyceraceae	0	white flowers	https://inaturalist.ca/taxa/792780-Boopis	https://www.researchgate.net/figure/Species-and-environmental-preferences-in-the-Australis-subclade-A-Boopis-australis-at_fig6_328312432
Moschopsis	Moschopsis rosulata	Calyceraceae	not found
Campanula	Campanula ramulosa	Campanulaceae	0	blue flowers	https://www.britannica.com/plant/bellflower-plant	https://sites.google.com/site/efloraofindia/species/a---l/c/campanulaceae/campanula/campanula-pallida
Cyphia	Cyphia decora	Campanulaceae	1	Purple blotches on mauve background		http://www.plantsoftheworldonline.org/taxon/urn:lsid:ipni.org:names:5667-1
Dialypetalum	Dialypetalum sp.	Campanulaceae	not found
Lobelia	Lobelia erinus	Campanulaceae	1	blue background with dark blue stipes and yellow blotch		http://www.plantsoftheworldonline.org/taxon/urn:lsid:ipni.org:names:143240-1
Pseudonemacladus	Pseudonemacladus oppositifolius	Campanulaceae	not found
Trachelium	Trachelium caeruleum	Campanulaceae	0	violet blue		http://powo.science.kew.org/taxon/urn:lsid:ipni.org:names:5856-1
Canella	Canella winterana	Canellaceae	0	red flowers		http://www.plantsoftheworldonline.org/taxon/urn:lsid:ipni.org:names:146013-1
Cinnamodendron	Cinnamodendron ekmanii	Canellaceae	not found
Cannabis	Cannabis sativa	Cannabaceae	0	white flower		http://www.plantsoftheworldonline.org/taxon/urn:lsid:ipni.org:names:306087-2
Celtis	Celtis philippensis	Cannabaceae	0	white flower		http://www.plantsoftheworldonline.org/taxon/urn:lsid:ipni.org:names:56400-3
Capparis	Capparis spinosa	Capparaceae	0	white flower		http://www.flowersinisrael.com/Capparisspinosa_page.htm
Abelia	Abelia triflora	Caprifoliaceae	0	white flowers + pink tube	flowersofindia.net	https://www.flowersofindia.net/catalog/slides/Himalayan%20Abelia.html
Acanthocalyx	Acanthocalyx albus	Caprifoliaceae	not found
Centranthus	Centranthus ruber	Caprifoliaceae	0	pink flower		https://keyserver.lucidcentral.org/weeds/data/media/Html/centranthus_ruber_subsp._ruber.htm
Cryptothladia	Cryptothladia chinensis	Caprifoliaceae	not found
Diervilla	Diervilla sessilifolia	Caprifoliaceae	0	yellowish green flowers		https://plants.ces.ncsu.edu/plants/diervilla-sessilifolia/
Dipelta	Dipelta yunnanensis	Caprifoliaceae	0	white background with yellow blotch		https://treesandshrubsonline.org/articles/dipelta/dipelta-floribunda/
Dipsacus	Dipsacus sativus	Caprifoliaceae	not found
Fedia	Fedia cornucopiae	Caprifoliaceae	1	purple background with dark purple blotch	http://www.africanplants.senckenberg.de/root/index.php?page_id=78&id=8439#	http://www.freenatureimages.eu/plants/Flora%20D-I/Fedia%20cornucopiae/index.html
Heptacodium	Heptacodium miconoides	Caprifoliaceae	0	white flowers or pink flowers		https://plants.ces.ncsu.edu/plants/heptacodium-miconioides/
Kolkwitzia	Kolkwitzia amabilis	Caprifoliaceae	0/1	sometimes with pink background and yellow spots		https://treesandshrubsonline.org/articles/kolkwitzia/kolkwitzia-amabilis/
Leycesteria	Leycesteria formosa	Caprifoliaceae	0	white flowers.		https://landscapeplants.oregonstate.edu/plants/leycesteria-formosa
Linnaea	Linnaea borealis	Caprifoliaceae	0/1	white background with magenta coloured blotch; sometimes light magenta background with dark magenta blotch		https://www.swcoloradowildflowers.com/Pink%20Enlarged%20Photo%20Pages/linnaea%20borealis.htm
Lonicera	Lonicera maackii	Caprifoliaceae	0	white flowers		https://www.minnesotawildflowers.info/shrub/amur-honeysuckle
Morina	Morina longifolia	Caprifoliaceae	1	pink background with pink blotch		http://www.flowersofindia.net/catalog/slides/Himalayan%20Whorlflower.html
Nardostachys	Nardostachys jatamansi	Caprifoliaceae	1?	pink background with pink blotch	http://www.efloras.org/object_page.aspx?object_id=91804&flora_id=800	http://www.plantsoftheworldonline.org/taxon/urn:lsid:ipni.org:names:859418-1
Pterocephalodes	Pterocephalus hookeri	Caprifoliaceae	not found
Symphoricarpos	Symphoricarpos albus	Caprifoliaceae	0	white background with pink flush		https://plants.ces.ncsu.edu/plants/symphoricarpos-albus/
Triosteum	Triosteum perfoliatum	Caprifoliaceae	0	flower with maroon background		https://www.minnesotawildflowers.info/flower/late-horse-gentian
Triplostegia	Triplostegia glandulifera	Caprifoliaceae	0	white flower (sometimes pink flush)		http://www.efloras.org/object_page.aspx?object_id=89061&flora_id=800
Valeriana	Valeriana officinalis	Caprifoliaceae	0	white flowers.		https://plants.ces.ncsu.edu/plants/valeriana-officinalis/
Valerianella	Valerianella locusta	Caprifoliaceae	0	white flowers.		http://www.southeasternflora.com/view_flora.php?plantid=1198#
Weigela	Weigela hortensis	Caprifoliaceae	1	pink background with pink blotch		https://efloraofindia.com/2011/04/05/weigela-hortensis/
Zabelia	Zabelia tyaihyoni	Caprifoliaceae	0	white flowers.		https://plants.ces.ncsu.edu/plants/zabelia-tyaihyoni/
Patrinia	Patrinia triloba	Caprifoliaceae	0	yellow flowers		https://floraoftheworld.org/taxon/flora/17592186251865
Cardiopteris	Cardiopteris quinqueloba	Cardiopteridaceae	not found
Citronella	Citronella suaveolens	Cardiopteridaceae	not found
Gonocaryum	Gonocaryum litorale	Cardiopteridaceae	not found
Carica	Carica papaya	Caricaceae	0	white flowers		https://wildlifeofhawaii.com/flowers/1522/carica-papaya-papaya/
Caryocar	Caryocar glabrum	Caryocaraceae	0	light yellow petals	http://www.plantsoftheworldonline.org/taxon/urn:lsid:ipni.org:names:828599-1	https://floraoftheworld.org/taxon/flora/17592186251175
Stellaria	Stellaria media	Caryophyllaceae	0	white flowers		http://www.flowersofindia.net/catalog/slides/Chickweed.html
Casuarina	Casuarina equisetifolia	Casuarinaceae	0	petals absent?		http://www.maltawildplants.com/CASR/Casuarina_equisetifolia.php
Brexia	Brexia madagascarensis	Celastraceae	0	white petals	http://tropical.theferns.info/viewtropical.php?id=Brexia+madagascariensis	https://en.agroneo.com/gaia/celastraceae/brexia-madagascariensis
Celastrus	Celastrus orbiculatus	Celastraceae	0	greenish/white flowers		https://www.minnesotawildflowers.info/shrub/oriental-bittersweet
Denhamia	Denhamia pittosporoides	Celastraceae	not found
Maytenus	Maytenus arbutifolia	Celastraceae	0	creamish white flowers		http://plantweb.co.za/Plant_Pictures/Maytenus/Maytenus_heterophylla/Wallpaper/Maytenus_heterophylla_800x600.jpg
Parnassia	Parnassia palustris	Celastraceae	0	white flowers		https://www.minnesotawildflowers.info/flower/marsh-grass-of-parnassus
Plagiopteron	Plagiopteron suaveolens	Celastraceae	0	white flowers		http://english.xtbg.cas.cn/gh/lg/202005/t20200526_237769.html
Siphonodon	Siphonodon celastrineus	Celastraceae	not found
Stackhousia	Stackhousia monogyna	Celastraceae	0	white flowers		http://www.plantsystematics.org/imgs/meredith/r/Celastraceae_Stackhousia_monogyna_29416.html
Tripterygium	Tripterygium regelii	Celastraceae	0	white flowers		http://www.asianflora.com/Celastraceae/Tripterygium-regelii.htm
Paxistima	Paxistima canbyi	Celastraceae	0	magenta flowers		https://www.wildflower.org/gallery/result.php?id_image=32953
Elaeodendron	Elaeodendron orientale	Celestraceae	0	greenish white flowers		http://www.botany.hawaii.edu/faculty/carr/page9.htm
Euonymus	Euonymus americanus	Celestraceae	not clear	greenish white flowers (some with ting)??	https://plants.ces.ncsu.edu/plants/euonymus-americanus/	http://www.southeasternflora.com/view_flora.php?plantid=189#	https://mgnv.org/plants/shrubs-2/euonymus-americanus-strawberry-bush/#jp-carousel-34105
Bhesa	Bhesa robusta	Centroplacaceae	0	yellowish white flowers	https://singapore.biodiversity.online/species/P-Angi-002835	http://www.plantsoftheworldonline.org/taxon/urn:lsid:ipni.org:names:159988-1
Centroplacus	Centroplacus glaucinus	Centroplacaceae	not found
Cephalotus	Cephalotus follicularis	Cephalotaceae	0	while background and red or green blotch	http://www.carnivorousplantsociety.ca/index.php?threads/pollination-of-a-cephalotus-flower.1978/	https://carnivorousplantresource.com/the-plants/australian-pitcher-plant/
Ceratophyllum	Ceratophyllum demersum	Ceratophyllaceae	0	petals absent?		http://www.botany.hawaii.edu/faculty/carr/ceratophyll.htm
Cercidiphyllum	Cercidiphyllum japonicum	Cercidiphyllaceae	0	petals absent?		https://landscapeplants.oregonstate.edu/plants/cercidiphyllum-japonicum
Beta	Beta vulgaris subsp. maritima	Chenopodiaceae	0	green flowers		http://www.cnmflowers.org/mobile/species/Beta_vulgaris_maritima.htm
Spinacia	Spinacia oleracea	Chenopodiaceae	0	white flowers		https://plants.ces.ncsu.edu/plants/spinacia-oleracea/
Ascarina	Ascarina rubricaulis	Chloranthaceae	0	red flowers (petals reduced/absent?)		https://escholarship.org/content/qt4b83g16z/qt4b83g16z.pdf
Chloranthus	Chloranthus spicatus	Chloranthaceae	0	Yellow background only		https://www.researchgate.net/figure/The-flower-of-Chloranthus-spicatus-a-Two-mature-flowers-of-one-inflorescence-b-One_fig1_7716988	http://tropical.theferns.info/image.php?id=Chloranthus+spicatus
Hedyosmum	Hedyosmum arborescens	Chloranthaceae	0	yellowish green?		https://inpn.mnhn.fr/espece/cd_nom/629820?lg=en
Sarcandra	Sarcandra grandifolia	Chloranthaceae	0	Maroon background only		https://www.flowersofindia.net/catalog/slides/Short-Spike%20Chloranthus.html
Atuna	Atuna racemosa	Chrysobalanaceae	0	white flowers (purple stamens)		http://phytoimages.siu.edu/imgs/pelserpb/r/Chrysobalanaceae_Atuna_racemosa_62496.html
Chrysobalanus	Chrysobalanus icaco	Chrysobalanaceae	0	white flowers		http://www.plantsystematics.org/imgs/fm18/r/Chrysobalanaceae_Chrysobalanus_icaco_17207.html
Hirtella	Hirtella bicornis	Chrysobalanaceae	not found
Licania	Licania heteromorpha	Chrysobalanaceae	not found
Circaeaster	Circaeaster agrestis	Circaeasteraceae	0	no petals present	https://www.delta-intkey.com/angio/www/circaeas.htm	http://plantsoftheworldonline.org/taxon/urn:lsid:ipni.org:names:167828-1
Helianthemum	Helianthemum grandiflorum	Cistaceae	0	yellow flowers		https://calphotos.berkeley.edu/cgi/img_query?enlarge=0000+0000+0904+0203
Clethra	Clethra alnifolia	Clethraceae	0	white flowers		https://plants.ces.ncsu.edu/plants/clethra-alnifolia/
Clusia	Clusia rosea	Clusiaceae	0	white flowers with pink blotch		http://www.flowersofindia.net/catalog/slides/Autograph%20Tree.html
Garcinia	Garcinia subelliptica	Clusiaceae	0	small creamish white flowers		https://www.herbarium.gov.hk/subpages.aspx?id=8444
Pentaphalangium	Pentaphalangium latissimum	Clusiaceae	image not found
Columellia	Columellia oblonga	Columelliaceae	0	yellow flowers		http://powo.science.kew.org/taxon/urn:lsid:ipni.org:names:169715-1
Desfontainia	Desfontainia spinosa	Columelliaceae	1	red background with yellow pattern		https://stories.rbge.org.uk/archives/tag/desfontainia-spinosa
Terminalia	Terminalia catappa	Combretaceae	0	white flowers	http://www.flowersofindia.net/catalog/slides/Indian%20Almond.html	http://www.flowersofindia.net/catalog/slides/Indian%20Almond.html
Tradescantia	Tradescantia ohiensis	Commelinaceae	0	blue flowers		https://www.illinoiswildflowers.info/prairie/plantx/oh_spiderwortx.htm
Connarus	Connarus monocarpos (Connarus championii)	Connaraceae	0	white flowers		http://www.plantsoftheworldonline.org/taxon/urn:lsid:ipni.org:names:264426-1
Rourea	Rourea minor	Connaraceae	0	white flowers		http://flora-peninsula-indica.ces.iisc.ac.in/herbsheet.php?id=2767&cat=7
Cuscuta	Cuscuta gronoveii	Convolvulaceae	0	white flowers		https://gobotany.nativeplanttrust.org/species/cuscuta/gronovii/
Ipomoea	Ipomoea batatas	Convolvulaceae	0/1	light violet flowers with dark violet centrala blotch 'bulls-eye'+ streaks		http://www.flowersofindia.net/catalog/slides/Sweet%20Potato.html
Coriaria	Coriaria sarmentosa is a syn of Coriaria ruscifolia	Coriariaceae	0	mauve/white flowers		http://colplanta.org/taxon/urn:lsid:ipni.org:names:271369-1
Cornus	Cornus racemosa	Cornaceae	0	white flowers		https://www.illinoiswildflowers.info/trees/plants/gr_dogwood.htm
Kalanchoe	Kalanchoe daigremontiana	Crassulaceae	0	red flowers	https://identify.plantnet.org/invasion/observations/1009945936	https://www.researchgate.net/figure/An-inflorescence-of-Kalanchoe-houghtonii-photographed-near-Cascais-Portugal-The_fig1_279222030
Sedum	Sedum nudum	Crassulaceae	image not found
Crossosoma	Crossosoma bigelovii	Crossosomataceae	0	white flowers		https://swbiodiversity.org/seinet/taxa/index.php?taxon=3568
Crypteronia	Crypteronia paniculata	Crypteroniaceae	0	green flowers		https://floraoftheworld.org/taxon/flora/17592186255880
Ctenolophon	Ctenolophon englerianus	Ctenolophonaceae	image not found
Cucumis	Cucumis anguria	Cucurbitaceae	0	yellow flowers		http://www.plantsoftheworldonline.org/taxon/urn:lsid:ipni.org:names:292141-1
Cucurbita	Cucurbita pepo	Cucurbitaceae	0	yellow flowers		https://gobotany.nativeplanttrust.org/species/cucurbita/pepo/
Eucryphia	Eucryphia lucida	Cunoniaceae	0	white flowers		https://treesandshrubsonline.org/articles/eucryphia/eucryphia-lucida/
Geissois	Geissois bethamii syn of Geissois benthamiana	Cunoniaceae	image not found
Metasequoia	Metasequoia glyptostroboides	Cupressaceae	NO FLOWERS
Curtisia	Curtisia dentata	Curtisiaceae	0	white petals		https://floraoftheworld.org/taxon/flora/17592186250764
Cycas	Cycas revoluta	Cycadaceae	NO FLOWERS
Carludovica	Carludovica palmata	Cyclanthaceae	0	yellowish green		http://tropical.theferns.info/image.php?id=Carludovica+palmata
Cyrilla	Cyrilla racemiflora	Cyrillaceae	0	white flowers		https://plants.ces.ncsu.edu/plants/cyrilla-racemiflora/
Daphniphyllum	Daphniphyllum sp.	Daphniphyllumceae	0	petals absent		http://treeflower.la.coocan.jp/Daphniphyllaceae/Daphniphyllum%20humile/Daphniphyllum%20humile.htm
Datisca	Datisca glomerata	Datiscaceae	0	greenish yellow flowers		https://sbwildflowers.wordpress.com/wildflowers/datiscaceae/datisca/datisca-glomerata/
Degeneria	Degeneria vitiensis	Degeneriaceae	0	white petals		https://www.britannica.com/plant/Degeneria-vitiensis
Galax	Galax urceolata	Diapensiaceae	0	white flowers	https://plants.ces.ncsu.edu/plants/galax-urceolata/	https://gobotany.nativeplanttrust.org/species/galax/urceolata/
Dichapetalum	Dichapetalum rugusum	Dichapetalaceae	0	white flowers		http://www.plantsystematics.org/imgs/robbin/r/Dichapetalaceae_Dichapetalum_rugosum_39654.html
Tapura	Tapura fischeri	Dichapetalaceae	0	white petals		https://www.mozambiqueflora.com/speciesdata/image-display.php?species_id=134020&image_id=14
Alluaudia	Alluaudia ascendens	Didiereaceae	0	yellowish green flowers (numerous very small)		https://worldofsucculents.com/alluaudia-ascendens-fantsiolotse/
Calyptrotheca	Calyptrotheca somalensis	Didiereaceae	0	greenish white flowers		http://www.africanplants.senckenberg.de/root/index.php?page_id=78&id=2617#
Dillenia	Dillenia philippinenses	Dilleniaceae	0	white petals		http://tropical.theferns.info/viewtropical.php?id=Dillenia+philippinensis
Hibbertia	Hibbertia volubsis	Dilleniaceae	0	yellow flowers		http://www.canbr.gov.au/cpbr/cd-keys/RFK7/key/RFK7/Media/Html/entities/Hibbertia_scandens.htm
Tetracera	Tetracera asiatica	Dilleniaceae	0	white flowers		https://www.herbarium.gov.hk/subpages.aspx?id=5439
Dioncophyllum	Dioncophyllum thollonii	Dioncophyllaceae	image not found
Triphyophyllum	Triphyophyllum peltatum	Dioncophyllaceae	image not found
Dioscorea	Dioscorea alata	Dioscoreaceae	0	greenish yellow flowers		http://www.plantsoftheworldonline.org/taxon/urn:lsid:ipni.org:names:317625-1
Dipentodon	Dipentodon sinicus	Dipentodontaceae	0	white flowers	https://treesandshrubsonline.org/articles/dipentodon/dipentodon-sinicus/	https://botanicalgarden.ubc.ca/trekking-in-the-mountains-of-northern-vietnam/
Anisoptera	Anisoptera marginata	Dipterocarpaceae	image not found
Drosera	Drosera capensis	Droseraceae	0	purple petals		https://carnivorousplantresource.com/the-plants/drosera-capensis-narrow-leaf/
Drosophyllum	Drosophyllum lusitanicum	Drosophyllaceae	0	yellow flowers	https://www.britannica.com/plant/yellow-sundew	https://www.botany.one/2016/08/attract-anyway-benefits-large-showy-flowers-highly-autogamous-carnivorous-plant-species/
Diospyros	Diospyros lotus	Ebenaceae	0	orange flowers		https://www.flowersofindia.net/catalog/slides/Date%20Plum.html
Ehretia	Ehretia acuminata	Ehretiaceae	0	white flowers		http://www.flowersofindia.net/catalog/slides/Koda%20Tree.html
Elaeagnus	Elaeagnus umbellata	Elaeagnaceae	0	white flowers		https://gobotany.nativeplanttrust.org/species/elaeagnus/umbellata/
Sloanea	Sloanea latifolia	Elaeocarpaceae	image not found
Crinodendron	Crinodendron hookerianum	Elaeocorpaceae	0	rosy-pink flowers		https://landscapeplants.oregonstate.edu/plants/crinodendron-hookerianum
Elaeocarpus	Elaeocarpus sphaericus	Elaeocorpaceae	0	white flowers		http://www.flowersofindia.net/catalog/slides/Blue%20Marble%20Tree.html
Bergia	Bergia texana	Elatinaceae	0	white petals	https://calscape.org/view.php?pl=66112&img=65461&calphoto=1	https://calphotos.berkeley.edu/cgi/img_query?enlarge=0000+0000+0212+2708
Elatine	Elatine triandra	Elatinaceae	0	pink petals		https://gobotany.nativeplanttrust.org/species/elatine/triandra/
Arbutus	Arbutus unedo	Ericaceae	0	pink flowers		https://www.ornamental-trees.co.uk/arbutus-unedo-rubra-p1047
Heisteria	Heisteria concinna	Erythropalaceae	0	creamish white flowers		https://herbariovaa.org/taxa/index.php?tid=25796
Erythroxylum	Erythroxylum confusum	Erythroxylaceae	0	white flowers		https://florida.plantatlas.usf.edu/Photo.aspx?id=17409&display=photos
Anopterus	Anopterus macleanus	Escalloniaceae	0	mostly white flowers, some have pink flush on white		https://www.utas.edu.au/dicotkey/dicotkey/OTHERS/gAnopterus.htm
Eremosyne	Eremosyne pectinata	Escalloniaceae	0	white flowers		https://keys.lucidcentral.org/keys/v3/FFPA/key/FFPA/Media/Html/Saxifragaceae%20Images.htm
Escallonia	Escallonia coquimbensis	Escalloniaceae	image not found
Forgesia	Forgesia racemosa	Escalloniaceae	0	white background with pink flush		https://www.pbase.com/rogiervanvugt/image/134465130
Tribeles	Tribeles australis	Escalloniaceae	image not found
Valdivia	Valdivia gayana	Escalloniaceae	0	dark pink petals		https://stories.rbge.org.uk/archives/5755
Polyosma	Polyosma cunninghamii	Escalloniaceae	0	greenish white flowers		https://apps.lucidcentral.org/plants_se_nsw/text/entities/polyosma_cunninghamii.htm
Eucommia	Eucommia ulmoides	Eucommiaceae	0	green flowers?	https://cdn.britannica.com/18/12018-050-4A12B78E/Eucommia-ulmoides.jpg	https://www.researchgate.net/figure/Male-and-female-individuals-of-Eucommia-ulmoides-distinguished-by-flowers_fig1_341445656
Acalypha	Acalypha californica	Euphorbiaceae	0	petals absent	The Jepson Herbarium University of California, Berkeley	https://ucjeps.berkeley.edu/eflora/eflora_display.php?tid=11696
Codiaeum	Codiaeum variegatum	Euphorbiaceae	0	petals absent		http://www.flowersofindia.net/catalog/slides/Croton.html
Conceveiba	Conceveiba martiana	Euphorbiaceae	0	petals brown?		http://malpighiales.myspecies.info/taxonomy/term/109/media?type=All&page=2
Croton	Croton alabamensis	Euphorbiaceae	0	petals small and yellow		http://www.southeasternflora.com/view_flora.php?plantid=1414#
Dalechampia	Dalechampia spathulata	Euphorbiaceae	0	pink tepals?		http://www.plantsoftheworldonline.org/taxon/urn:lsid:ipni.org:names:1092397-2
Endospermum	Endospermum moluccanum	Euphorbiaceae	0	greenish white flowers		http://tropical.theferns.info/image.php?id=Endospermum+moluccanum
Euphorbia	Euphorbia polycroma	Euphorbiaceae	0	very small yellow flowers		https://plants.ces.ncsu.edu/plants/euphorbia-epithymoides/
Hevea	Hevea brasiliensis	Euphorbiaceae	0	yellow flowers		https://www.flowersofindia.net/catalog/slides/Para%20Rubber%20Tree.html
Homalanthus	Homalanthus populneus	Euphorbiaceae	0	spike of very small yellow flowers		http://www.canbr.gov.au/cpbr/cd-keys/RFK7/key/RFK7/Media/Html/entities/Homalanthus_populifolius.htm
Hura	Hura crepitans	Euphorbiaceae	0	petals absent, calyx dark pink		https://www.monaconatureencyclopedia.com/hura-crepitans/?lang=en
Lasiocroton	Lasiocroton bahamensis	Euphorbiaceae	image not found
Manihot	Manihot grahamii	Euphorbiaceae	1	green background + violet streaks		https://www.discoverlife.org/mp/20p?see=I_EHCP3163&res=640
Moultonianthus	Moultonianthus leembruggianus	Euphorbiaceae	flower image not found
Neoscortechinia	Neoscortechinia kingii	Euphorbiaceae	flower image not found
Omphalea	Omphalea diandra	Euphorbiaceae	flower image not found
Pimelodendron	Pimelodendron zoanthogyne	Euphorbiaceae	flower image not found
Spathiostemon	Spathiostemon javensis	Euphorbiaceae	flower image not found
Suregada	Suregada boiviniana	Euphorbiaceae	0	green flowers small		http://keralaplants.in/keralaplantsdetails.aspx?id=Suregada_multiflora
Tetrorchidium	Tetrorchidium rubrivenium	Euphorbiaceae	0	green flowers small		http://tropical.theferns.info/image.php?id=Tetrorchidium+rubrivenium
Trigonostemon	Trigonostemon verrucosus	Euphorbiaceae	flower image not found
Ricinus	Ricinus communis	Euphorbiaceae	0	small yellow flowers		https://plants.ces.ncsu.edu/plants/ricinus-communis/
Euphronia	Euphronia guianensis	Euphroniaceae	1	light purple flowers with dark purple spots		http://powo.science.kew.org/taxon/724860-1
Eupomatia	Eupomatia bennettii	Eupomatiaceae	0	creamish white background + red blotch		https://keys.lucidcentral.org/keys/v3/FFPA/key/FFPA/Media/Html/Eupomatiaceae%20Images.htm
Euptelea	Euptelea polyandra	Eupteleaceae	0	dark red flower		https://arboretum.harvard.edu/plants/image-search/?keyword=Euptelea+polyandra
Albizia	Albizia julibrissin	Fabaceae	0	petals absent/reduced?		https://selectree.calpoly.edu/tree-detail/albizia-julibrissin
Cicer	Cicer arietinum	Fabaceae	1	violet background with dark violet stripes		http://tropical.theferns.info/image.php?id=Cicer+arietinum
Glycine	Glycine max	Fabaceae	0/1	white flowers/violet background with dark violet blotch	https://www.flowersofindia.net/catalog/slides/Soya%20Bean.html	https://www4.uwsp.edu/biology/courses/plantid/061-Glycine_max.htm
Lotus	Lotus japonicus	Fabaceae	0/1	yellow flowers/with streaks		https://www.genetik.bio.lmu.de/research/parniske/models/lotusjaponicus/index.html
Medicago	Medicago truncatula	Fabaceae	0	yellow flowers.		https://www.frontiersin.org/files/Articles/363968/fpls-09-00854-HTML/image_m/fpls-09-00854-g001.jpg
Pisum	Pisum sativum	Fabaceae	1	purple flower with dark magenta blotch and streaks		http://www.flowersinisrael.com/Pisumsativum_page.htm
Chrysolepis	Chrysolepis sempervirens	Fagaceae	0	yellow flowers.		https://calphotos.berkeley.edu/cgi/img_query?enlarge=0000+0000+0806+0177
Fagus	Fagus sylvatica	Fagaceae	0	yellow flowers.		https://gobotany.nativeplanttrust.org/species/fagus/sylvatica/
Quercus	Quercus multinervis	Fagaceae	flower image not found
Fouquieria	Fouquieria columnaris	Fouquieriaceae	0	creamish white flowers		http://www.agaveville.org/viewtopic.php?f=72&t=5621
Melianthus	Melianthus comosus	Francoaceae	0	carrot-red coloured petals		https://keyserver.lucidcentral.org/weeds/data/media/Html/melianthus_comosus.htm
Viviania	Viviania marifolia	Francoaceae	0	pink flowers		http://www.chileflora.com/Florachilena/FloraEnglish/HighResPages/EH0057.htm
Frankenia	Frankenia pulverulenta	Frankeniaceae	0	white petals		https://gobotany.nativeplanttrust.org/species/frankenia/pulverulenta/
Garrya	Garrya elliptica	Garryaceae	0	white background with pink and green flush		https://plants.ces.ncsu.edu/plants/garrya-elliptica/
Gelsemium	Gelsemium sempervirens	Gelsemiaceae	1	yellow flower with orange blotch		https://plants.ces.ncsu.edu/plants/gelsemium-sempervirens/
Exacum	Exacum affine	Gentianaceae	flower image not clear
Gentiana	Gentiana purpurea	Gentianaceae	1	purple-pink background with dark purple spots		https://www.monaconatureencyclopedia.com/gentiana-purpurea/?lang=en
Geranium	Geranium himalayense	Geraniaceae	1	blue background with dark blue streaks		https://efloraofindia.com/2012/09/25/geranium-himalayense/
Saintpaulia	Streptocarpus ionanthus	Gesneriaceae	1	blue background with dark blue streaks		https://www.malawiflora.com/speciesdata/image-display.php?species_id=152700&image_id=11
Ginkgo	Ginkgo biloba	Ginkgoaceae	NO FLOWERS
Gisekia	Gisekia africana	Gisekiaceae	0	purple flower	https://www.mozambiqueflora.com/speciesdata/image-display.php?species_id=122720&image_id=2	https://www.botswanaflora.com/speciesdata/image-display.php?species_id=122720&image_id=4
Gnetum	Gnetum ula	Gnetaceae	NO FLOWERS
Gomortega	Gomortega keule	Gomortegaceae	0	white flower	http://eprints.nottingham.ac.uk/11105/1/Thesis-Gomortega.pdf	https://chileanendemics.rbge.org.uk/taxa/gomortega-keule-molina-baill
Dampiera	Dampiera diversifolia	Goodeniaceae	flower image not clear			https://florabase.dpaw.wa.gov.au/browse/profile/7435
Goodenia	Goodenia ovate	Goodeniaceae	0	yellow petals	http://anpsa.org.au/g-ova.html	http://bio.mq.edu.au/wp-content/uploads/2018/04/Goodenia-ovata-flower-and-leaf.jpg
Scaevola	Scaevola aemula	Goodeniaceae	1	violet flowers with yellow blotch and dark violet streaks		https://www.nybg.org/blogs/plant-talk/2017/08/horticulture-2/whats-plant-name-scaevola-aemula/
Goupia	Goupia glabra	Goupiaceae	1	orange backgroud red blotch at base	http://www.plantsoftheworldonline.org/taxon/urn:lsid:ipni.org:names:161264-1	http://www.plantsystematics.org/imgs/shimizu/r/Goupiaceae_Goupia_glabra_38150.html
Griselinia	Griselinia littoralis	Griseliniaceae	0	greenish white male and female flowers		http://www.nzplants.auckland.ac.nz/en/about/seed-plants-flowering/griseliniaceae/griselinia-littoralis.html
Ribes	Ribes aureum	Grossulariaceae	0	yellow petals		https://www.minnesotawildflowers.info/shrub/golden-currant
Gunnera	Gunnera manicata	Gunneraceae	flower photo not found
Halophytum	Halophytum ameghinoi	Halophytaceae	flower photo not found
Haloragis	Haloragis eracta	Haloragaceae	0	white flowers		https://www.nzpcn.org.nz/flora/species/haloragis-erecta-subsp-erecta/
Myriophyllum	Myriophyllum sibiricum	Haloragaceae	0	white flowers		https://gobotany.nativeplanttrust.org/species/myriophyllum/sibiricum/
Corylopsis	Corylopsis pauciflora	Hamamelidaceae	0	white flowers		https://plants.ces.ncsu.edu/plants/corylopsis-pauciflora/
Exbucklandia	Exbucklandia populnea	Hamamelidaceae	0	white flowers		https://jcraulstonarboretum.wordpress.com/2013/08/15/plant-of-the-day-exbucklandia-populnea/
Hamamelis	Hamamelis virginiana	Hamamelidaceae	0	yellow flowers		https://gobotany.nativeplanttrust.org/species/hamamelis/virginiana/
Rhodoleia	Rhodoleia championii	Hamamelidaceae	0	pink petals		http://tropical.theferns.info/image.php?id=Rhodoleia+championii
Helwingia	Helwingia japonica	Helwingiaceae	0	white flowers	https://www.rayagarden.com/garden-plants/japanese-helwingia-helwingia-japonica-profile.html
Gyrocarpus	Gyrocarpus americanus	Hernandiaceae	0	white flowers		http://flora-peninsula-indica.ces.iisc.ac.in/herbsheet.php?id=4819&cat=7
Hernandia	Hernandia ovigera	Hernandiaceae	0	white flowers		http://www.stuartxchange.org/Koron-koron.html
Galbulimima	Galbulimima belgraveana	Himantandraceae	0	white flowers		https://keys.lucidcentral.org/keys/v3/FFPA/key/FFPA/Media/Html/Himantandraceae.htm
Afrostyrax	Afrostyrax sp.	Huaceae	not found
Hua	Hua gavonii	Huaceae	not found
Humiria	Humiria balsamifera	Humiriaceae	0	white petals	http://www.plantsystematics.org/imgs/shimizu/r/Humiriaceae_Humiria_balsamifera_39273.html	https://www.kew.org/science/tropamerica/imagedatabase/large1/cat_single1-2055.htm
Sacoglottis	Sacoglottis sp.	Humiriaceae	0	light yellow petals		https://serv.biokic.asu.edu/neotrop/plantae/taxa/index.php?tid=45354&taxauthid=1&clid=500
Vantanea	Vantanea guianensis	Humiriaceae	flower photo not found
Trithuria	Trithuria submersa	Hydatellaceae	flower photo not found
Hydrangea	Hydrangea macrophylla	Hydrangeaceae	0	background colour: blue/pink/white/violet		http://www.flowersofindia.net/catalog/slides/Hydrangea.html
Hydrocharis	Hydrocharis dubia	Hydrocharitaceae	0	white background with yellow blotch		http://www.plantsoftheworldonline.org/taxon/urn:lsid:ipni.org:names:431797-1
Hydrolea	Hydrolea ovata	Hydroleaceae	0	blue background	https://warcapps.usgs.gov/PlantID/Species/Details/106	http://www.wildflowersoftexas.com/hydrolea-ovata.html
Hydrophyllum	Hydrophyllum capitatum	Hydrophyllaceae	1	blue background + pink botch		https://calphotos.berkeley.edu/cgi/img_query?enlarge=0000+0000+0504+0789
Cratoxylum	Cratoxylum cochinchinense	Hypericaceae	0	red petals		http://tropical.theferns.info/image.php?id=Cratoxylum+cochinchinense
Hypericum	Hypericum perforatum	Hypericaceae	0	yellow flowers		https://keyserver.lucidcentral.org/weeds/data/media/Html/hypericum_perforatum.htm
Triadenum	Triadenum walteri	Hypericaceae	0	white background with yellow blotch		https://herbarium.utk.edu/vascular/vascular-photos-enlarge.php?CategoryID=Dicots&FamilyID=Hypericaceae&GenusID=Triadenum&SpeciesID=walteri&PhotoNameID=tr_walt&PhotographerNameID=Dennis%20D.%20Horn
Vismia	Vismia billbergiana	Hypericaceae	1	yellow flowers with dark red streaks and spots		https://floraoftheworld.org/taxon/flora/17592186249287
Icacina	Icacina mannii	Icacinaceae	0	white background with pink flush		http://tropical.theferns.info/image.php?id=Icacina+mannii
Iris	Iris sp.	Iridaceae	1	blue background with yellow and dark blue blotch		https://plants.ces.ncsu.edu/plants/iris-reticulata/
Irvingia	Irvingia malayana	Irvingiaceae	flower photo not available
Klainedoxa	Klainedoxa gabonensis	Irvingiaceae	0	whitish green petals		http://tropical.theferns.info/image.php?id=Klainedoxa+gabonensis
Choristylis	Choristylis rhamnoides	Iteaceae	0	white flowers		https://floraoftheworld.org/taxon/flora/17592186251587
Itea	Itea virginica	Iteaceae	0	white flowers		https://plants.ces.ncsu.edu/plants/itea-virginica/
Ochthocosmus	Ochthocosmus longipedicellatus	Ixonanthaceae	flower photo not available
Juglans	Juglans mandshurica	Juglandaceae	0	green petals?		https://floraoftheworld.org/taxon/flora/17592186259776
Triglochin	Triglochin maritima	Juncaginaceae	0	greenish sepals/petals		https://www.minnesotawildflowers.info/flower/seaside-arrowgrass
Krameria	Krameria ixine	Krameriaceae	0	magenta pink petals		http://www.phytoimages.siu.edu/imgs/paraman1/r/Krameriaceae_Krameria_ixine_119036.html
Lacistema	Lacistema aggregatum	Lacistemataceae	0	white flowers		https://serv.biokic.asu.edu/neotrop/plantae/imagelib/imgdetails.php?imgid=184802
Lozania	Lozania pittieri	Lacistemataceae	0	yellowish green flowers		http://www.plantsystematics.org/imgs/robbin/r/Lacistemataceae_Lozania_pittieri_41685.html
Lamium	Lamium purpureum	Lamiaceae	1	purple background with purple spots		https://www.canr.msu.edu/resources/henbit-lamium-amplexicaule
Peltanthera	Peltanthera floribunda	Lamiales incertae sedis	flower photo not available
Decaisnea	Decaisnea fargesii	Lardizabalaceae	0	greenish-yellow flowers		http://www.plantsystematics.org/imgs/jdelaet/r/Lardizabalaceae_Decaisnea_fargesii_24003.html
Sargentodoxa	Sargentodoxa cuneata	Lardizabalaceae	0	greenish-white flowers	http://www.epilepsynaturapedia.com/index.php/Sargentodoxa_cuneata	https://floraoftheworld.org/taxon/flora/17592186251815
Lardizabala	Lardizabala biternata	Lardizabalaceae	0	blackish red petals		http://tropical.theferns.info/image.php?id=Lardizabala+biternata
Cryptocarya	Cryptocarya meissneriana	Lauraceae	0	grenish-yellow flowers		http://lauraceae.myspecies.info/taxonomy/term/15874/media
Laurus	Laurus nobilis	Lauraceae	0	small yellow flowers		http://tropical.theferns.info/viewtropical.php?id=Laurus+nobilis
Couroupita	Couroupita guianensis	Lecythidaceae	0	red petals (white at base)		http://sweetgum.nybg.org/science/projects/lp/taxon-details/?irn=133473
Leea	Leea guineensis	Leeaceae	0	red petals.		https://www.flowersofindia.net/catalog/slides/Guinea%20Leea.html
Pinguicula	Pinguicula moranensis	Lentibulariaceae	1	purple background with dark purple stripes		https://blogs.reading.ac.uk/tropical-biodiversity/2013/05/mexican-butterworts/
Lepidobotrys	Lepidobotrys staudtii	Lepidobotryaceae	flower photo not available
Ruptiliocarpon	Ruptiliocarpon caracolito	Lepidobotryaceae	flower photo not available
Lilium	Lilium michauxii	Liliaceae	1	yellow tepals background + brown spots		https://plants.ces.ncsu.edu/plants/lilium-michauxii/
Limeum	Limeum africanum	Limeaceae	0	greenish white petals		http://www.calflora.net/southafrica/limeum_africanum.html
Floerkea	Floerkea proserpinacoides	Limnanthaceae	0	white petals		https://gobotany.nativeplanttrust.org/species/floerkea/proserpinacoides/
Durandea	Durandea pentagyna	Linaceae	0/1	yellow background with dark yellow blotch		http://www.flowersofindia.net/catalog/slides/Karmal.html
Hugonia	Hugonia platysepala	Linaceae	1	yellow background with orange blotch		http://www.centralafricanplants.senckenberg.de/root/index.php?page_id=34&id=6000#
Reinwardtia	Reinwardtia indica	Linaceae	1	yellow background with dark yellow blotch		http://www.flowersofindia.net/catalog/slides/Yellow%20Flax.html
Linum	Linum perenne	Linaceae	1	blue background with dark blue stripes		https://gobotany.nativeplanttrust.org/species/linum/perenne/
Mentzelia	Mentzelia lindleyi	Loasaceae	1	yellow background with dark orange stripes		https://calphotos.berkeley.edu/cgi/img_query?enlarge=0000+0000+0504+0763
Petalonyx	Petalonyx nitidus	Loasaceae	0	white background with yellow blotch		https://calphotos.berkeley.edu/cgi/img_query?enlarge=0000+0000+0810+2204
Strychnos	Strychnos nux-vomica	Loganiaceae	0	greenish-yellow flowers		http://flora-peninsula-indica.ces.iisc.ac.in/herbsheet.php?id=5431&cat=7
Lophopyxis	Lophopyxis maingayi	Lophopyxidaceae	0	greenish white flowers		https://floraoftheworld.org/taxon/flora/17592186250734?page=2
Gaiadendron	Gaiadendron punctatum	Loranthaceae	0	yellow flowers	http://www.plantsystematics.org/imgs/robbin/r/Loranthaceae_Gaiadendron_punctatum_37871.html	http://www.plantsystematics.org/imgs/robbin/r/Loranthaceae_Gaiadendron_punctatum_37876.html
Lythrum	Lythrum salicaria	Lythraceae	1	purple background + dark purple streaks		https://gobotany.nativeplanttrust.org/species/lythrum/salicaria/
Liriodendron	Liriodendron tulipifera	Magnoliaceae	1	yellowish green background with orange blotch		https://www.nybg.org/blogs/plant-talk/2017/06/horticulture-2/whats-in-a-plant-name-liriodendron-tulipifera-l/
Magnolia	Magnolia denudata	Magnoliaceae	0	white petals		https://www.researchgate.net/figure/Flower-and-fruits-of-Magnolia-denudata-a-A-blooming-flower-b-Red-seeds-hanging-on_fig3_275481696
Malpighia	Malpighia coccigera	Malpighiaceae	0	white petals		http://www.flowersofindia.net/catalog/slides/Miniature%20Holly.html
Thryallis	Thryallis longifolia	Malpighiaceae	0	yellow petals		https://onlinelibrary.wiley.com/doi/abs/10.1111/njb.01016
Acridocarpus	Acridocarpus natalitius	Malpigiaceae	0	yellow flowers	EOL	https://africageographic.com/stories/medicinal-plants-pondoland/acridocarpus-natalitius-var-natalitius-fosters-folly/, https://eol.org/pages/5026184
Byrsonima	Byrsonima crassifolia	Malpigiaceae	1	yellow petals with orange blotch later		https://www.sciencedirect.com/topics/agricultural-and-biological-sciences/byrsonima-crassifolia
Dicella	Dicella nucifera	Malpigiaceae	0	young flowers are yellow, mature flowers are red		https://webapps.lsa.umich.edu/herb/malpigh/Photos/CarCladePhoto/DicGallery/DicPhoto1.html
Gossypium	Gossypium hirsutum	Malvaceae	0	dark red blotch on white background		https://gobotany.nativeplanttrust.org/species/gossypium/hirsutum/
Sterculia	Sterculia recordiana	Malvaceae	flower photo not available
Maranta	Maranta bicolor is a syn of Maranta cristata	Marantaceae	0	purple stripes on white background		https://www.biolib.cz/en/image/id315296/
Marcgravia	Marcgravia rectiflora	Marcgraviaceae	0	petals absent?		http://www.plantsystematics.org/imgs/dws/r/Marcgraviaceae_Marcgravia_rectiflora_26197.html
Martynia	Martynia annua	Martyniaceae	1	purple background with dark purple blotch + yellow blotch/spots		http://keralaplants.in/keralaplantsdetails.aspx?id=Martynia_annua
Trillium	Trillium gracile	Melanthiaceae	0	grapewine coloured petals?	https://www.wildflowersearch.org/search?&PlantName=Trillium+gracile	https://www.fs.fed.us/wildflowers/plant-of-the-week/images/gracefultrillium/Trillium-gracile-1_lg.jpg
Clidemia	Clidemia petiolaris	Melastomataceae	0	white petals with pink stamens		http://sweetgum.nybg.org/science/projects/melastomataceae/taxon-details/?irn=140008
Swietenia	Swietenia macrophylla	Meliaceae	0	greenish white petals		https://herbariovaa.org/imglib/neotrop/misc/201406/20925_1403287988_web.jpg
Fauria	Fauria crista-galli	Menyanthaceae	0	white petals		https://www.centralcoastbiodiversity.org/deer-cabbage-bull-fauria-crista-galli.html
Menispermum	Menispermum canadense	Menispermaceae	0	white petals		https://www.minnesotawildflowers.info/shrub/canada-moonseed
Tinospora	Hyalosepalum caffrum	Menispermaceae	flower photo not available
Menyanthes	Menyanthes trifoliata	Menyanthaceae	0	white flowers		https://gobotany.nativeplanttrust.org/species/menyanthes/trifoliata/
Nymphoides	Nymphoides geminata	Menyanthaceae	0	yellow flowers	https://austplants.com.au/Nymphoides-geminata-Entire-Marshwort	https://apps.lucidcentral.org/plants_se_nsw/text/entities/nymphoides_geminata.htm
Villarsia	Villarsia calthifolia is syn of Ornduffia calthifolia	Menyanthaceae	0	yellow flowers		https://florabase.dpaw.wa.gov.au/browse/profile/6554
Mollugo	Mollugo verticillata	Molluginaceae	0	white petals		http://www.missouriplants.com/Mollugo_verticillata_page.html
Hedycarya	Hedycarya arborea	Monimiaceae	0	creamish green petals?		https://www.nzpcn.org.nz/flora/species/hedycarya-arborea/
Peumus	Peumus boldus	Monimiaceae	0	white petals		http://tropical.theferns.info/viewtropical.php?id=Peumus+boldus
Claytonia	Claytonia verginica	Montiaceae	1	purple background with purple streaks		https://botanyphoto.botanicalgarden.ubc.ca/2015/04/claytonia-virginica/
Montinia	Montinia caryophyllacea	Montiniaceae	0	white flowers		http://www.plantsystematics.org/imgs/meredith/r/Montiniaceae_Montinia_caryophyllacea_41523.html
Morus	Morus nigra	Moraceae	0	petals greenish?		https://www.phillyorchards.org/2016/07/01/the-plucky-mulberry-morus/
Musa	Musa basjoo	Musaceae	0	yellow		http://powo.science.kew.org/taxon/urn:lsid:ipni.org:names:323785-2
Delarbrea	Delarbrea michieana	Myodocarpaceae	0	dark maroon petals		http://www.canbr.gov.au/cpbr/cd-keys/RFK7/key/RFK7/Media/Html/entities/Delarbrea_michieana.htm
Myodocarpus	Myodocarpus fraxinifolius	Myodocarpaceae	0	greenish white petals?		https://floraoftheworld.org/taxon/flora/17592186250427
Myrica	Morella esculenta	Myricaceae	flower photo not available
Mauloutchia	Mauloutchia chapelieri	Myristicaceae	0	white flowers		https://www.prota4u.org/database/protav8.asp?g=psk&p=Mauloutchia+chapelieri+(Baill.)+Warb.
Myristica	Myristica fragrans	Myristicaceae	0	white flowers.		https://www.flowersofindia.net/catalog/slides/Nutmeg.html
Myrothamnus	Myrothamnus flabellifolia	Myrothamnaceae	0	magenta-red petals		https://www.researchgate.net/figure/Hydrated-male-A-C-and-female-B-D-flowers-and-desiccated-male-E-and-female-F_fig2_6583906
Eucalyptus	Eucalyptus lehmannii	Myrtaceae	0	red petals		https://trees.stanford.edu/ENCYC/EUCleh.htm
Myrtus	Myrtus communis	Myrtaceae	0	white flowers		https://www.flowersofindia.net/catalog/slides/True%20Myrtle.html
Nelumbo	Nelumbo nucifera	Nelumbonaceae	0	white flowers with pink tips		http://powo.science.kew.org/taxon/urn:lsid:ipni.org:names:605422-1
Nepenthes	Nepenthes alata	Nepenthaceae	no flower photo
Nitraria	Nitraria retusa	Nitrariaceae	0	white petals		http://www.plantsoftheworldonline.org/taxon/urn:lsid:ipni.org:names:873339-1
Nothofagus	Nothofagus antarctica	Nothofagaceae	0	creamish yellow petals		https://selectree.calpoly.edu/tree-detail/nothofagus-antarctica
Bougainvillea	Bougainvillea glabra	Nyctaginaceae	0	white flowers with colourful bracts	http://www.flowersinisrael.com/exoticBougainvilleaglabra_page.htm	http://www.flowersofindia.net/catalog/slides/Bougainvillea.html
Mirabilis	Mirabilis jalapa	Nyctaginaceae	0/1	horticultural varieties have random patterning		http://www.plantsoftheworldonline.org/taxon/urn:lsid:ipni.org:names:162591-2	http://www.flowersofindia.net/catalog/slides/Four%20O%27clock.html
Nuphar	Nuphar advena	Nymphaeaceae	0	yellow petals		https://gobotany.nativeplanttrust.org/species/nuphar/variegata/
Nymphaea	Nymphaea odorata	Nymphaeaceae	0	white flowers	https://www.minnesotawildflowers.info/flower/american-white-water-lily	http://www.illinoiswildflowers.info/wetland/plants/fr_waterlily.htm
Nyssa	Nyssa sylvatica	Nyssaceae	0	green flowers		https://gobotany.nativeplanttrust.org/species/nyssa/sylvatica/
Cespedesia	Cespedesia bonplondii syn. of Cespedesia spathulata	Ochnaceae	0	yellow flowers	https://herbariovaa.org/imagelib/imgdetails.php?imgid=185628	http://www.plantsystematics.org/imgs/sv22/na/Ochnaceae_Cespedesia_spathulata_36610.html
Luxemburgia	Luxemburgia ciliosa	Ochnaceae	0	yellow flowers		https://herbariovaa.org/taxa/index.php?tid=37375&clid=0&pid=0&taxauthid=1
Medusagyne	Medusagyne oppositifolia	Ochnaceae	0	white flowers		http://www.africanplants.senckenberg.de/root/index.php?page_id=78&id=3810#
Ochna	Ochna multiflora	Ochnaceae	0	yellow flowers		http://www.phytoimages.siu.edu/imgs/paraman1/r/Ochnaceae_Ochna_multiflora_2283.html
Quiina	Quiina pteridophylla	Ochnaceae	no flower photo
Sauvagesia	Sauvagesia erecta	Ochnaceae	0	white petals (red stamens)		http://www.plantsystematics.org/imgs/shimizu/r/Ochnaceae_Sauvagesia_erecta_36673.html
Touroulia	Touroulia guianensis	Ochnaceae	no flower photo
Jasminum	Jasminum suavissimum	Oleaceae	0	white flowers		http://anpsa.org.au/j-sua.html
Syringa	Syringa vulgaris	Oleaceae	0	purple/violet background		https://plants.ces.ncsu.edu/plants/syringa-vulgaris/
Oenothera	Oenothera speciosa	Onagraceae	1	pink background with green and yellow blotches and dark pink streaks		http://www.missouriplants.com/Oenothera_speciosa_page.html
Oncotheca	Oncotheca balansae	Oncothecaceae	0	creamish yelow flowers		https://floraoftheworld.org/taxon/flora/17592186258033
Opilia	Opilia amentacea	Opiliaceae	0	green flowers		https://www.flowersofindia.net/catalog/slides/Fragrant%20Opilia.html
Oncidium	Oncidium ornithoglossum	Orchidaceae	no flower photo
Phalaenopsis	Phalaenopsis chibae	Orchidaceae	1	yellow background with maroon blotch and spots		http://www.phals.net/chibae/index_e.html
Pedicularis	Pedicularis racemosa	Orobanchaceae	0	white flowers		https://calphotos.berkeley.edu/cgi/img_query?enlarge=0000+0000+0812+3111
Averrhoa	Averrhoa carambola	Oxalidaceae	1	Purple flower with dark purple central blotch		https://www.nparks.gov.sg/florafaunaweb/flora/2/7/2736
Dapania	Dapania racemosa	Oxalidaceae	no flower photo
Oxalis	Oxalis dillenii	Oxalidaceae	0	flower with yellow background	Minnesota wild flowers/ Kew science	http://www.plantsoftheworldonline.org/taxon/urn:lsid:ipni.org:names:177944-2	https://www.minnesotawildflowers.info/flower/southern-wood-sorrel
Paeonia	Paeonia tenuifolia	Paeoniaceae	0	red/maroon background colour of flowers		http://www.peonies.org/P_tenuifolia.html
Galearia	Galearia filiformis	Pandaceae	no flower photo
Microdesmis	Microdesmis puberula	Pandaceae	0	peach coloured flowers		http://korupplants.myspecies.info/taxonomy/term/235
Panda	Panda oleosa	Pandaceae	0	pink flowers		http://www.westafricanplants.senckenberg.de/root/index.php?page_id=14&id=2583#
Dicentra	Dicentra eximia	Papaveraceae	0	reflexed outer pink petals and white inner petals		https://hort.extension.wisc.edu/articles/bleeding-heart-dicentra-spectabilis/
Eschscholzia	Eschscholzia californica	Papaveraceae	1	yellow background with orange blotch		https://gobotany.nativeplanttrust.org/species/eschscholzia/californica/
Hypecoum	Hypecoum imberbe	Papaveraceae	0/1	yellow flowers with brown spots.		http://powo.science.kew.org/taxon/urn:lsid:ipni.org:names:673240-1
Paracryphia	Paracryphia alticola	Paracryphiaceae	no flower photo
Sphenostemon	Sphenostemon lobosporus	Paracryphiaceae	no flower photo
Quintinia	Quintinia quatrefagesii	Paracryphiaceae	0	white flowers		https://floraoftheworld.org/taxon/flora/17592186256852
Malesherbia	Malesherbia linearifolia	Passifloraceae	0	blue background on petal lobes with white blotch-like at base and throat/tube		http://www.chileflora.com/Florachilena/FloraEnglish/HighResPages/EH0050A.htm
Passiflora	Passiflora standleyi	Passifloraceae	no flower photo
Turnera	Turnera ulmifolia	Passifloraceae	0	yellow flowers		http://www.flowersofindia.net/catalog/slides/Yellow%20Alder.html
Paulownia	Paulownia tomentosa	Paulowniaceae	1	Blue background and yellow blotch	https://plants.ces.ncsu.edu/plants/paulownia-tomentosa/	https://botanicgardens.uw.edu/about/blog/2014/05/04/the-empress-tree-is-blooming/
Sesamum	Sesamum indicum	Pedaliaceae	1	purple background with purple blotch	https://www.flowersofindia.net/catalog/slides/Malabar%20Sesame.html	http://www.floraofbangladesh.com/2016/05/til-sesamum-indicum.html	http://tropical.theferns.info/image.php?id=Sesamum+indicum
Olinia	Olinia ventosa	Penaeaceae	0	white flowers	https://v3.boldsystems.org/index.php/Taxbrowser_Taxonpage?taxid=331257	http://pza.sanbi.org/olinia-ventosa
Pennantia	Pennantia cunninghamii	Pennantiaceae	0	white flowers		https://apps.lucidcentral.org/plants_se_nsw/text/entities/pennantia_cunninghamii.htm
Pentaphragma	Pentaphragma ellipticum	Pentaphragmataceae	0	white flowers		https://floraoftheworld.org/taxon/flora/17592186253287
Ternstroemia	Ternstroemia stahlii	Pentaphylacaceae	no flower photo
Penthorum	Penthorum sedoides	Penthoraceae	0	petals absent? (small flowers)		https://gobotany.nativeplanttrust.org/species/penthorum/sedoides/
Clutia	Clutia tomentosa	Peraceae	no flower photo
Pera	Pera bicolor	Peraceae	no flower photo
Pogonophora	Pogonophora schomburgkiana	Peraceae	0	white flowers		http://tropical.theferns.info/image.php?id=Pogonophora+schomburgkiana
Peridiscus	Peridiscus lucidus	Peridiscaceae	no flower photo
Soyauxia	Soyauxia floribunda	Peridiscaceae	no flower photo
Rivina	Rivina humilis	Petiveriaceae	0	pink blush		http://www.flowersofindia.net/catalog/slides/Blood%20Berry.html
Phelline	Phelline billardierei	Phellinaceae	0	creamish white flowers		https://floraoftheworld.org/taxon/flora/17592186263863
Philydrum	Philydrum lanuginosum	Philydraceae	0	yellow flowers		http://www.canbr.gov.au/cpbr/cd-keys/RFK7/key/RFK7/Media/Html/entities/Philydrum_lanuginosum.htm
Phryma	Phryma leptostachya	Phrymaceae	0	white with pink flush		https://www.minnesotawildflowers.info/flower/american-lopseed
Aporusa	Aporosa frutescens	Phyllanthaceae	0	numerous yellow flowers		https://singapore.biodiversity.online/species/P-Angi-003021
Bischofia	Bischofia javanica	Phyllanthaceae	0	numerous green flowers		https://www.flowersofindia.net/catalog/slides/Bishop%20Wood.html
Croizatia	Croizatia brevipetiolater	Phyllanthaceae	no flower photo
Heywoodia	Heywoodia lucens	Phyllanthaceae	0	very small greenish white female flower; male flower petals absent?		http://pza.sanbi.org/heywoodia-lucens
Lachnostylis	Lachnostylis hirta [bilocularis]	Phyllanthaceae	0	white		https://floraoftheworld.org/taxon/flora/17592186252826
Phyllanthus	Phyllanthus flexuosus	Phyllanthaceae	no flower photo
Phyllonoma	Phyllonoma laticuspis	Phyllonomaceae	0	white petals	http://www.plantsoftheworldonline.org/taxon/urn:lsid:ipni.org:names:37120-1	https://floraoftheworld.org/taxon/flora/17592186259571
Physena	Physena madagascariensis	Physenaceae	0	petals absent?	https://mobile.twitter.com/TeamKMCC/status/938677774876839936	https://floraoftheworld.org/taxon/flora/17592186251408?page=2
Phytolacca	Phytolacca americana	Phytolaccaceae	0	white petals		http://www.missouriplants.com/Phytolacca_americana_page.html
Picramnia	Picramnia latifolia	Picramniaceae	0	small greenish flowers		https://floraoftheworld.org/taxon/flora/17592186256802
Androstachys	Androstachys johnsonii	Picrodendraceae	0	petals absent.	https://www.zimbabweflora.co.zw/speciesdata/image-display.php?species_id=134720&image_id=6	http://pza.sanbi.org/androstachys-johnsonii
Austrobuxus	Austrobuxus megacarpus	Picrodendraceae	0	yellowish green perianth		http://www.anbg.gov.au/cpbr/cd-keys/RFK7/key/RFK7/Media/Html/entities/Austrobuxus_megacarpus.htm
Dissiliaria	Dissiliaria muelleri	Picrodendraceae	no flower photo
Micrantheum	Micrantheum hexandrum	Picrodendraceae	0	white male and female flowers		https://apps.lucidcentral.org/plants_se_nsw/text/entities/micrantheum_hexandrum.htm
Petalostigma	Petalostigma pubescens	Picrodendraceae	0	creamish yellow petals		http://www.northqueenslandplants.com/Australian%20Plant%20Families%20N-S/Picrodendraceae/Petalostigma/Petalostigma%20pubescens.html
Tetracoccus	Tetracoccus dioicus	Picrodendraceae	0	petals absent? numerous stamens with yellow pollen on red stalk		https://calphotos.berkeley.edu/cgi/img_query?enlarge=0000+0000+1102+0859
Podocalyx	Podocalyx loranthoides	Picrodendraceae	no flower photo
Pinus	Pinus taeda	Pinaceae	NO FLOWERS
Peperomia	Peperomia obtusifolia	Piperaceae	0	very small flowers; greenish white		https://www.flowersofindia.net/catalog/slides/Baby%20Rubberplant.html
Piper	Piper nigrum	Piperaceae	0	very small flowers; green		http://plantsoftheworldonline.org/taxon/urn:lsid:ipni.org:names:682369-1
Pittosporum	Pittosporum japonicum	Pittosporaceae	no flower photo
Sollya	Sollya heterophylla syn of Billardiera heterophylla (Lindl.) L.W.Cayzer & Crisp .	Pittosporaceae	0	blue flowers	https://keyserver.lucidcentral.org/weeds/data/media/Html/billardiera_fusiformis.htm	http://www.plantsystematics.org/imgs/kcn2/r/Pittosporaceae_Sollya_heterophylla_5902.html
Antirrhinum	Antirrhinum majus	Plantaginaceae	1			http://plantinfo.co.za/plant/antirrhinum-majus/
Platanus	Platanus occidentalis	Platanaceae	0	non showy petals (cluster of small flowers)		https://landscapeplants.oregonstate.edu/plants/platanus-acerifolia
Plocosperma	Plocosperma buxifolium	Plocospermataceae	1	violet blue flowers with dark violet streaks		https://floraoftheworld.org/taxon/flora/17592186252589
Limonium	Limonium arborescens	Plumbaginaceae	0	white petals		http://powo.science.kew.org/taxon/urn:lsid:ipni.org:names:77128677-1
Plumbago	Plumbago auriculata	Plumbaginaceae	1	blue background with dark blue streaks		https://plants.ces.ncsu.edu/plants/plumbago-auriculata/
Oryza	Oryza sativa	Poaceae	0	petals absent, green		https://www.botany.one/2019/01/an-overview-on-reproductive-isolation-in-oryza-sativa-complex/
Saccharum	Saccharum officinarum	Poaceae	0	no showy petals petals absent?		http://www.flowersofindia.net/catalog/slides/Sugarcane.html
Zea	Zea mays	Poaceae	0	petals absent?, not pigmented		https://www.illinoiswildflowers.info/grasses/plants/corn.html
Podocarpus	Podocarpus macrophyllus	Podocarpaceae	NO FLOWERS			http://www.botany.hawaii.edu/faculty/carr/images/pod_mac_m.jpg
Marathrum	Marathrum rubrum	Podostemaceae	no flower photo
Podostemum	Podostemum ceratophyllum	Podostemaceae	0	petals absent?		https://www.wildflower.org/gallery/result.php?id_image=45907
Polemonium	Polemonium californicum	Polemoniaceae	1	bluish background with yellow+white blotch and violet streaks		https://calscape.org/Polemonium-californicum-()
Polygala	Polygala pauciflora	Polygalaceae	0	purple background only		https://gobotany.nativeplanttrust.org/species/polygala/paucifolia/
Bistorta	Bistorta amplexicaulis	Polygonaceae	0	pink flowers		https://www.flowersofindia.net/catalog/slides/Red%20Mountain%20Fleeceflower.html
Fagopyrum	Fagopyrum cymosum	Polygonaceae	0	white flowers		http://www.flowersofindia.net/catalog/slides/Perennial%20Buckwheat.html
Polygonum	Persicaria virginiana	Polygonaceae	0	white flowers		https://www.minnesotawildflowers.info/flower/jumpseed
Portulaca	Portulaca oleracea	Portulacaceae	0	yellow flowers		https://plants.ces.ncsu.edu/plants/portulaca-oleracea/
Potamogeton	Potamogeton berchtoldii	Potamogetonaceae	0	petals absent? [no showy flowers]		https://www.illinoiswildflowers.info/wetland/plants/sl_pondwd.html
Androsace	Androsace spinulifera	Primulaceae	1	Purple flower with dark purple blotch	efloras.orgs	http://www.efloras.org/object_page.aspx?object_id=90808&flora_id=800
Clavija	Clavija integrifolia	Primulaceae	no flower photo
Maesa	Maesa japonica	Primulaceae	0	creamish white background colour flower		http://treeflower.la.coocan.jp/Myrsinaceae/Maesa%20japonica/Maesa%20japonica.htm
Primula	Primula elatior	Primulaceae	1	creamish yellow background with yellow streaks		https://plants.ces.ncsu.edu/plants/primula-elatior/
Petrophile	Petrophile canescens	Proteaceae	0	yellow flowers		https://apps.lucidcentral.org/plants_se_nsw/text/entities/petrophile_canescens.htm
Roupala	Roupala macrophylla	Proteaceae	no flower photo
Drypetes	Drypetes madagascariensis	Putranjivaceae	0	greenish yellow flowers		http://tropical.theferns.info/image.php?id=Drypetes+madagascariensis#plantimages/e/d/ed9489d5cc9ad74f4bc1991be826e05bd2f829e8.jpg
Putranjiva	Putranjiva zeylanica	Putranjivaceae	no flower photo
Quillaja	Quillaja saponaria	Quillajaceae	0	White flowers	https://web.stanford.edu/~siegelr/flora/quillaja.html	Quillaja saponaria' from the website Trees and Shrubs Online (treesandshrubsonline.org/articles/quillaja/quillaja-saponaria/). Accessed 2021-04-18.
Glaucidium	Glaucidium palmatum	Ranunculaceae	0	mauve background only		http://powo.science.kew.org/taxon/urn:lsid:ipni.org:names:711245-1
Hydrastis	Hydrastis canadensis	Ranunculaceae	0	petals not present? large white stamens present		http://www.missouriplants.com/Hydrastis_canadensis_page.html
Ranunculus	Ranunculus acris	Ranunculaceae	1	Yellow background with light yellowish green blotch	https://www.glaucus.org.uk/Buttercups.html	https://www.illinoiswildflowers.info/weeds/plants/tall_buttercup.html
Stegolepis	Stegolepis ligulata	Rapateaceae	flower photo not clear
Reseda	Reseda alba	Resedaceae	0	white flowers		http://www.flowersinisrael.com/Resedaalba_page.htm
Rhabdodendron	Rhabdodendron amazonicum	Rhabdodendraceae	0	green petals?		http://sweetgum.nybg.org/science/projects/saba/specimen-details/?irn=2772365
Ceanothus	Ceanothus sanguineus	Rhamnaceae	0	white flowers		https://calscape.org/Ceanothus-sanguineus-()
Rhamnus	Rhamnus cathartica	Rhamnaceae	0	greenish yellow flowers		https://www.uwgb.edu/biodiversity/herbarium/trees/rhacat01.htm
Bruguiera	Bruguiera gymnorrhiza	Rhizophoraceae	0	Complex Magenta pattern on white background		https://plants.usda.gov/java/largeImage?imageID=brgy_004_ahp.tif
Carallia	Carallia brachiata	Rhizophoraceae	0	white flowers		http://www.canbr.gov.au/cpbr/cd-keys/RFK7/key/RFK7/Media/Html/entities/Carallia_brachiata.htm
Paradrypetes	Paradrypetes subintegrifolia	Rhizophoraceae	no flower photo
Paropsia	Paropsia madagascariensis	Rhizophoraceae	0	creamish white		https://www.capriviflora.com/speciesdata/image-display.php?species_id=141020&image_id=11
Rhizophora	Rhizophora stylosa	Rhizophoraceae	0	white flowers		http://www.mangrove.at/rhizophora-stylosa_stilted-mangrove.html
Prunus	Prunus persica	Rosaceae	0	rosy pink flowers		https://plants.ces.ncsu.edu/plants/prunus-persica/
Spiraea	Spiraea thunbergii	Rosaceae	0	white flowers		https://gobotany.nativeplanttrust.org/species/spiraea/thunbergii/
Abrophyllum	Abrophyllum ornans	Rousseaceae	0	creamish white petals	Australian National Botanics Gardens	http://www.anbg.gov.au/cpbr/cd-keys/RFK7/key/RFK7/Media/Html/entities/Abrophyllum_ornans.pdf
Carpodetus	Carpodetus serratus	Rousseaceae	0	white background		https://www.nzpcn.org.nz/flora/species/carpodetus-serratus/
Cuttsia	Cuttsia viburnea	Rousseaceae	0	white flowers		http://floragreatlakes.info/html/rfspecies/cuttsia.html
Roussea	Roussea simplex	Rousseaceae	0	orange petals		http://powo.science.kew.org/taxon/urn:lsid:ipni.org:names:793128-1
Coffea	Coffea arabica	Rubiaceae	0	white flowers		http://www.flowersofindia.net/catalog/slides/Coffee.html
Galium	Galium aparine	Rubiaceae	0	white flowers	http://climbers.lsa.umich.edu/?p=461	https://gobotany.nativeplanttrust.org/species/galium/aparine/
Luculia	Luculia gratissima	Rubiaceae	0	light pink/pink petals	http://www.plantsystematics.org/imgs/dws/r/Rubiaceae_Luculia_gratissima_18812.html	http://www.flowersofindia.net/catalog/slides/Pleasant%20Luculia.html
Citrus	Citrus trifoliata	Rutaceae	0	white flowers	https://landscapeplants.oregonstate.edu/plants/poncirus-trifoliata	https://plants.ces.ncsu.edu/plants/citrus-trifoliata/
Meliosma	Meliosma veitchiorum	Sabiaceae	0	creamish-yellow flowers		https://www.researchgate.net/figure/4-Inflorescences-and-flowers-of-1-Meliosma-veitchiorum-2-4-M-dilleniifolia-and-3_fig3_51186831
Sabia	Sabia swinhoei	Sabiaceae	0	small greenish yellow flowers		https://www.herbarium.gov.hk/subpages.aspx?id=2842
Abatia	Abatia parviflora	Salicaceae	0	petals absent? yellow stamens numerous	plant systematics.org	http://www.plantsystematics.org/imgs/mha8/r/Flacourtiaceae_Abatia_parviflora_2523.html, http://www.plantsystematics.org/imgs/mha8/r/Passifloraceae_Abatia_parviflora_2522.html
Casearia	Casearia sylvestris	Salicaceae	0	greenish white petals		http://www.plantsoftheworldonline.org/taxon/urn:lsid:ipni.org:names:274165-2
Dovyalis	Dovyalis rhamnoides	Salicaceae	0	greenish - yellow petals		http://pza.sanbi.org/dovyalis-rhamnoides
Flacourtia	Flacourtia indica	Salicaceae	0	no petals - yellow flower		http://www.plantsoftheworldonline.org/taxon/urn:lsid:ipni.org:names:365348-1
Idesia	Idesia polycarpa	Salicaceae	0	small greenish yellow flowers		https://treesandshrubsonline.org/articles/idesia/idesia-polycarpa/
Lunania	Lunania parviflora	Salicaceae	0	small yellow flowers		https://floraoftheworld.org/taxon/flora/17592186257862
Populus	Populus alba	Salicaceae	0	very small flowers (colourless/white)		https://gobotany.nativeplanttrust.org/species/populus/alba/
Prockia	Prockia crucis	Salicaceae	0	greenish flowers with yellow stamens		https://nationalzoo.si.edu/object/nmnhbotany_10328958
Salix	Salix reticulata	Salicaceae	0	very small flowers (red bracts, colourless petals)		https://www.flora.dempstercountry.org/0.Site.Folder/Species.Program/Species.php?species_id=Salix.reti
Scyphostegia	Scyphostegia borneensis	Salicaceae	0	greenish white petals		https://floraoftheworld.org/taxon/flora/17592186253684?page=3
Poliothyrsis	Poliothyrsis sinensis	Salicaceae	0	small flowers yellow		http://www.asianflora.com/Flacourtiaceae/Poliothyrsis-sinensis.htm
Santalum	Santalum album	Santalaceae	0	small magenta coloured flowers		http://www.flowersofindia.net/catalog/slides/Sandalwood.html
Cupaniopsis	Cupaniopsis anacardioides	Sapindaceae	0	greenish white petals		https://www.moreland.vic.gov.au/environment-bins/trees/tree-finder/cupaniopsis-anacardioides/
Manilkara	Manilkara zapota	Sapotaceae	0	white flowers		https://www.monaconatureencyclopedia.com/manilkara-zapota-2/?lang=en
Sarcobatus	Sarcobatus vermiculatus	Sarcobataceae	0	no showy petals - green?		https://www.swcoloradowildflowers.com/Yellow%20Enlarged%20Photo%20Pages/sarcobatus%20vermiculatus.htm
Sarracenia	Sarracenia purpurea	Sarraceniaceae	0	red flowers	https://gobotany.nativeplanttrust.org/species/sarracenia/purpurea/	https://www.fs.fed.us/wildflowers/plant-of-the-week/sarracenia_purpurae.shtml
Houttuynia	Houttuynia cordata	Saururaceae	0	white flowers.		http://powo.science.kew.org/taxon/urn:lsid:ipni.org:names:927252-1
Saururus		Saururaceae	0	white flowers (very small)		https://plants.ces.ncsu.edu/plants/saururus-cernuus/
Heuchera	Heuchera micrantha	Saxifragaceae	0	white background - flower		http://science.halleyhosting.com/nature/plants/5petal/saxi/heuchera/diversifolia.html
Saxifraga	Saxifraga mertensiana	Saxifragaceae	0	white background - flower		http://www.botany.hawaii.edu/faculty/carr/saxifrag.htm
Daucus	Daucus carota	Apiaceae	0	white background		https://www.flowersofindia.net/catalog/slides/Carrot.html
Illicium	Illicium verum	Schisandraceae	0	white background		https://www.indefenseofplants.com/blog/2016/2/17/star-anise-a-window-into-the-earliest-flowering-plants
Kadsura	Kadsura japonica	Schisandraceae	0	greenish white petals		http://www.asianflora.com/Schisandraceae/Kadsura-japonica.htm
Schisandra	Schisandra chinensis	Schisandraceae	0	cream coloured petals - flowers		https://www.researchgate.net/figure/Schisandra-chinensis-Staminate-and-carpellate-flowers-a-Flowers-of-both-genders-in-a_fig1_230996852
Schoepfia	Schoepfia schreberi	Schoepfiaceae	0	red flowers		http://www.acguanacaste.ac.cr/paginas_especie/magnoliophyta/olacaceae/schoepfia_schreberi/s_shreberi12feb98/s_schreberi12feb98_ingl.html
Scrophularia	Scrophularia californica	Scrophulariaceae	0	blood-red background		http://nathistoc.bio.uci.edu/plants/Scrophulariaceae/Scrophularia%20californica.htm
Ailanthus	Ailanthus altissima	Simaroubaceae	0	white petals	flowersofindia.net	https://www.flowersofindia.net/catalog/slides/Tree%20of%20Heaven.html
Simmondsia	Simmondsia chinensis	Simmondsiaceae	0	greenish petals?		https://calscape.org/Simmondsia-chinensis-()
Siparuna	Siparuna decipiens	Siparunaceae	no flower photo			https://www.kew.org/science/tropamerica/neotropikey/families/Siparunaceae.htm
Smilax	Smilax bona-nox	Smilacaceae	0	green petals	http://www.missouriplants.com/Smilax_bona-nox_page.html	http://www.sbs.utexas.edu/bio406d/images/pics/smi/smilax_bona-nox.htm
Atropa	Atropa belladona	Solanaceae	0	greenish yellow petals		http://www.flowersofindia.net/catalog/slides/Belladonna.html
Nicotiana	Nicotiana tabacum	Solanaceae	0	purple/pink flush on white background		http://www.flowersofindia.net/catalog/slides/Tobacco.html
Solanum	Solanum oedipus	Solanaceae	0	purple flowers		http://www.flora.sa.gov.au/efsa/lucid/Solanaceae/Solanum%20species/key/Australian%20Solanum%20species/Media/Html/Solanum_oedipus.htm
Sphenoclea	Sphenoclea zeylanica	Sphenocleaceae	0	white flowers		http://www.westafricanplants.senckenberg.de/root/index.php?page_id=14&id=1487#
Stachyurus	Stachyurus chinensis	Stachyuraceae	0	white flowers		https://www.scottarboretum.org/stachyurus/
Staphylea	Staphylea trifolia	Staphyleaceae	0	white flowers with pink tinge	https://swbiodiversity.org/seinet/taxa/index.php?taxon=120423&clid=2967	https://plants.ces.ncsu.edu/plants/staphylea-trifolia/
Stegnosperma	Stegnosperma halimifolium	Stegnospermataceae	0	greenish white flowers		https://swbiodiversity.org/seinet/taxa/index.php?tid=31659
Croomia	Croomia japonica	Stemonaceae	0	white flowers		https://floraoftheworld.org/taxon/flora/17592186261265
Gomphandra	Gomphandra javanica	Stemonaceae	no flower photo
Grisollea	Grisollea myriantha	Stemonaceae	no flower photo
Irvingbaileya	Irvingbaileya australis	Stemonaceae	0	greenish white flowers (very small)		http://www.canbr.gov.au/cpbr/cd-keys/RFK7/key/RFK7/Media/Html/entities/Irvingbaileya_australis.htm
Halleria	Halleria tetragona	Stilbaceae	0	red flowers		https://floraoftheworld.org/taxon/flora/17592186254938
Ixerba	Ixerba brexioides	Strasburgeriaceae	0	white flowers		https://www.nzpcn.org.nz/flora/species/ixerba-brexioides/
Strasburgeria	Strasburgeria robusta	Strasburgeriaceae	1?	yellow background/orange spots?		http://www.mobot.org/mobot/research/newcaledonia/image/1643_75.jpg
Strelitzia	Strelitzia reginae	Strelitziaceae	0	orange petals		http://powo.science.kew.org/taxon/urn:lsid:ipni.org:names:798194-1
Donatia	Donatia fascicularis	Stylidiaceae	0	white flowers		https://research.reading.ac.uk/herbarium/dmm_slide-gallery_8/
Forstera	Forstera bidwillii syn. of Forstera tenella	Stylidiaceae	0	white flowers with yellow streaks		https://www.nzpcn.org.nz/flora/species/forstera-tenella/
Stylidium	Stylidium graminifolium	Stylidiaceae	0	purple petalas		http://anpsa.org.au/s-gra.html
Styrax	Styrax japonicus	Styracaceae	0	white flowers	http://www.plantsoftheworldonline.org/taxon/urn:lsid:ipni.org:names:826818-1	https://canr.udel.edu/udbg/?plant=styrax-japonicus
Stylobasium	Stylobasium spathulatum	Surianaceae	flower photo not found
Talinum	Talinum paniculatum	Talinaceae	0	purple pink flowers	https://swbiodiversity.org/seinet/taxa/index.php?taxauthid=1&taxon=303&clid=2548	http://www.b4fn.org/resources/species-database/detail/talinum-paniculatum/
Tamarix	Tamarix pentandra syn. of Tamarix chinensis Lour.	Tamaricaceae	0	flowers very small - pink		http://southwestdesertflora.com/WebsiteFolders/All_Species/Tamaricaceae/Tamarix%20chinensis,%20Chinese%20Saltcedar.html
Tapiscia	Tapiscia sinensis	Tapisciaceae	0	creamish yellow flowers (very small)		https://www.botany.one/2018/01/carbohydrate-metabolism-androdioecy-maintenance-tapiscia-sinensis/
Tetracarpaea	Tetracarpaea tasmanica	Tetracarpaeaceae	0	creamish white flowers	http://www.northqueenslandplants.com/Australian%20Plant%20Families%20G-M/Haloragaceae/Tetracarpaea/Tetracarpaea%20tasmannica.html	https://www.utas.edu.au/dicotkey/dicotkey/Halorag/fTetracarpaceae.htm
Polypremum	Polypremum procumbens	Tetrachondraceae	0	white flower		http://www.missouriplants.com/Polypremum_procumbens_page.html
Tetramerista	Tetramerista sp.	Tetrameristaceae	flower photo not found
Camellia	Camellia japonica	Theaceae	0	red/pink flowers		https://plants.ces.ncsu.edu/plants/camellia-japonica/
Thomandersia	Thomandersia laurifolia	Thomandersiaceae	flower photo not found
Thymelaea	Thymelaea hirsuta	Thymelaeaceae	0	yellow flowers		http://www.plantsoftheworldonline.org/taxon/urn:lsid:ipni.org:names:832995-1
Tofieldia	Tofieldia calyculata	Tofieldiaceae	0	yellow flowers		https://calphotos.berkeley.edu/cgi/img_query?enlarge=0000+0000+0805+0267
Pleea	Pleea tenuifolia	Tofieldiaceae	0	white flowers		http://www.southeasternflora.com/view_flora.php?plantid=1515
Aralidium	Aralidium pinnatifidum	Torricelliaceae	0	yellow flowers		https://singapore.biodiversity.online/species/P-Angi-001386
Melanophylla	Melanophylla alnifolia	Torricelliaceae	0	white flowers	Missouri Botanical Garden	http://www.mobot.org/MOBOT/research/conspectus/melano.shtml
Torricellia	Torricellia tiliifolia	Torricelliaceae	flower photo not found		Vascular Plants Herbarium of the Komarov Botanical Institute RAS — Herbarium LE	http://en.herbariumle.ru/?t=occ&id=8685&rid=image_0018003
Trigonia	Trigonia nivea	Trigoniaceae	0	white background + yellow blotch	Flora of the world	https://floraoftheworld.org/taxon/flora/17592186252035
Trimenia	Trimenia moorei	Trimeniaceae	0	white flower (those are bracts?)		https://davidtng.wordpress.com/2012/08/22/trimenia-a-living-botanical-dinosaur/
Hordeum	Hordeum murinum	Poaceae	0	very small flowers; without pigments; greenish creamish		https://wnmu.edu/academic/nspages/gilaflora/hordeum_murinum.html
Tetracentron	Tetracentron sinense	Trochodendraceae	0	very small flowers; without pigments; greenish		https://www.cell.com/trends/genetics/fulltext/S0168-9525(21)00002-0
Trochodendron	Trochodendron aralioides	Trochodendraceae	0	very small yellow flowers?		https://plants.ces.ncsu.edu/plants/trochodendron-aralioides/
Tropaeolum	Tropaeolum majus	Tropaeolaceae	1	orange flowers with red blotch and streaks; yellow flower with orange blotch and streaks	pers. obs. and sampled plant species.	https://keyserver.lucidcentral.org/weeds/data/media/Html/tropaeolum_majus.htm
Sparganium	Sparganium glomeratum	Typhaceae	0	green flowers		http://wisflora.herbarium.wisc.edu/taxa/index.php?taxon=5121
Typha	Typha latifolia	Typhaceae	0	pale green or yellow flowers		http://www.flowersinisrael.com/Typhalatifolia_page.htm
Zelkova	Zelkova serrata	Ulmaceae	0	pale green or yellow flowers		http://www.plantsystematics.org/imgs/dws/r/Ulmaceae_Zelkova_serrata_31686.html
Pilea	Pilea cadierei	Urticaceae	0	white flowers		http://cookislands.bishopmuseum.org/showImage.asp?file=MM/MX1-4/4P055_Pile-cadi_RR_GM_MX.jpg&title=Pilea+cadierei++%28Aluminium+Plant%29&height=400&width=600
Urtica	Urtica cannabina	Urticaceae	0	white flowers		https://www.biolib.cz/en/image/id85314/
Vahlia	Vahlia capensis	Vahliaceae	1	some varieties have Yellow flowers with maroon stripes	https://www.mozambiqueflora.com/speciesdata/image-display.php?species_id=183740&image_id=3	https://www.mozambiqueflora.com/speciesdata/image-display.php?species_id=125250&image_id=8
Verbena	Verbena bracteata	Verbenaceae	0	Flowers with purple background colour		https://www.minnesotawildflowers.info/flower/big-bract-verbena
Hybanthus	Hybanthus concolor	Violaceae	0	Greenish white flowers		http://www.plantsystematics.org/imgs/kcn2/r/Violaceae_Hybanthus_concolor_22098.html
Hymenanthera	Hymenanthera alpina	Violaceae	0	yellow flowers		http://www.nzflora.info/factsheet/Taxon/Melicytus-alpinus.html
Leonia	Leonia glycycarpa	Violaceae	0	yellow flowers		https://www.kew.org/science/tropamerica/imagedatabase/large1156/cat_single1156-1.htm
Viola	Viola philippica	Violaceae	1	Purple flowers with purple streaks	https://indiabiodiversity.org/biodiv/img//Viola%20philippica/Viola_philippica_1.jpg	http://plantsoftheworldonline.org/taxon/urn:lsid:ipni.org:names:868955-1
Rinorea	Rinorea pubiflora	Violaceae	Flower image not available			http://plantsoftheworldonline.org/taxon/urn:lsid:ipni.org:names:221441-2
Vitis	Vitis aestivalis	Vitaceae	0	no distinct petals present; flower greenish with yellow anthers		https://www.minnesotawildflowers.info/shrub/summer-grape
Qualea	Qualea grandiflora	Vochysiaceae	0	yellow flower		http://www.plantsystematics.org/imgs/shimizu/r/Vochysiaceae_Qualea_grandiflora_38744.html
Welwitschia	Welwitschia mirabilis	Welwitschiaceae	NO FLOWERS
Drimys	Drimys winteri	Winteraceae	0	white flowers		https://selectree.calpoly.edu/tree-detail/drimys-winteri
Takhtajania	Takhtajania perrieri	Winteraceae	0	white picottee pattern		http://www.mobot.org/mobot/madagasc/winterac.html
Tasmannia	Tasmannia insipida	Winteraceae	0	creamish background of inner tepals and outer tepals pink? (due to pink bud-blush?)		http://anpsa.org.au/t-ins.html
Xanthorrhoea	Xanthorrhoea quadrangulata	Xanthorrhoeaceae	no flower photo
Ximenia	Ximenia americana	Ximeniaceae	0	creamish green		http://www.plantsoftheworldonline.org/taxon/urn:lsid:ipni.org:names:316341-2
Zamia	Zamia pygmaea	Zamiaceae	NO FLOWERS
Guaiacum	Guaiacum sanctum	Zygophyllaceae	0	blue background only		http://www.botany.hawaii.edu/faculty/carr/zygophyll.htm
Idria	Idria		missing accession, accessions show Fouquieria sp.
Soltis et al—American Journal of Botany 98(4):704-730. 2011. – Data Supplement S1 – page 1
Soltis, Douglas E., Stephen A. Smith, Nico Cellinese, Kenneth J. Wurdack, David C. Tank, Samuel F. Brockington, Nancy F. Refulio-Rodriguez, Jay B. Walker, Michael J. Moore, Barbara S. Carlsward, Charles D. Bell, Maribeth Latvis, Sunny Crawley, Chelsea Black, Diaga Diouf, Zhenxiang Xi, Catherine A. Rushworth, Matthew A. Gitzendanner, Kenneth J. Sytsma, Yin-Long Qiu, Khidir W. Hilu, Charles C. Davi…
Appendix S1. Summary table of taxa analyzed, genes sequenced, and GenBank information for the current study. Note that the four genes psbBNTH are presented here as a single unit.
